# Supplementary material for: Insights into the key determinants of membrane protein topology enable the identification of new monotopic folds
Source: eLife. 2018 Aug 31;7:e40889. doi: 10.7554/eLife.40889 (PMC6133551; doi:10.7554/eLife.40889)
Supplement: Supplementary file 4. — Interactions between residues of the hydrophobic and globular domains are highlighted in red (>90% probability) and orange (80–90% probability). [file elife-40889-supp4.xlsx]

## Sheet: legend
	Column labels:
	i, j = the ith and jth sequence positions
	i_id, j_id = the residues at the ith and jth positions in the submitted sequence
	r_sco = the predicted score for interaction between the ith and jth positions
	s_sco = the scaled score for interaction between the ith and jth positions
	prob = probability interaction between the ith and jth positions
	Covariance analysis was performed using the GREMLIN web-server (http://gremlin.bakerlab.org/).

## Sheet: HofN
i	j	i_id	j_id	r_sco	s_sco	prob
4	7	4_P	7_F	0.1074	1.004	0.926
4	8	4_P	8_L	0.0885	0.828	0.788
5	95	5_I	95_W	0.0953	0.892	0.852
5	88	5_I	88_Q	0.0851	0.796	0.749
6	10	6_N	10_W	0.1105	1.033	0.938
6	9	6_N	9_P	0.0997	0.932	0.883
7	92	7_F	92_T	0.0833	0.779	0.726
9	126	9_P	126_G	0.0882	0.825	0.784
10	14	10_W	14_R	0.1282	1.199	0.979
10	15	10_W	15_R	0.1064	0.995	0.921
11	21	11_R	21_F	0.1304	1.22	0.982
11	17	11_R	17_A	0.0997	0.933	0.884
14	18	14_R	18_F	0.1379	1.29	0.989
15	21	15_R	21_F	0.0845	0.791	0.742
15	57	15_R	57_A	0.0777	0.727	0.65
17	20	17_A	20_R	0.1303	1.219	0.982
17	47	17_A	47_E	0.0861	0.805	0.76
17	87	17_A	87_R	0.0803	0.751	0.686
18	22	18_F	22_W	0.0878	0.821	0.78
18	112	18_F	112_L	0.0786	0.735	0.662
20	39	20_R	39_I	0.0819	0.766	0.708
22	26	22_W	26_F	0.097	0.908	0.865
23	26	23_L	26_F	0.0917	0.858	0.82
24	36	24_L	36_I	0.0845	0.791	0.742
27	68	27_V	68_T	0.0824	0.771	0.715
28	63	28_A	63_R	0.1394	1.304	0.99
28	31	28_A	31_L	0.1198	1.121	0.965
28	83	28_A	83_S	0.0979	0.916	0.872
28	77	28_A	77_Q	0.0839	0.784	0.733
30	110	30_L	110_A	0.1074	1.004	0.926
30	37	30_L	37_T	0.1063	0.994	0.921
30	38	30_L	38_L	0.1002	0.937	0.887
30	56	30_L	56_Q	0.0999	0.935	0.886
31	34	31_L	34_V	0.1324	1.239	0.984
31	35	31_L	35_G	0.103	0.964	0.904
32	36	32_L	36_I	0.094	0.88	0.841
34	55	34_V	55_L	0.1353	1.265	0.987
35	48	35_G	48_A	0.1017	0.952	0.897
35	90	35_G	90_Q	0.0894	0.836	0.797
35	164	35_G	164_Q	0.0825	0.772	0.716
36	40	36_I	40_L	0.1532	1.433	0.996
36	170	36_I	170_T	0.0912	0.853	0.815
38	41	38_L	41_R	0.1137	1.064	0.949
38	42	38_L	42_L	0.107	1.001	0.924
38	46	38_L	46_A	0.0953	0.891	0.851
39	43	39_I	43_T	0.112	1.048	0.944
39	42	39_I	42_L	0.0907	0.849	0.811
39	137	39_I	137_L	0.0849	0.794	0.746
40	44	40_L	44_G	0.1382	1.293	0.989
42	45	42_L	45_S	0.1062	0.993	0.92
42	143	42_L	143_Q	0.0903	0.845	0.807
43	102	43_T	102_L	0.0849	0.794	0.746
44	72	44_G	72_L	0.0807	0.755	0.692
45	53	45_S	53_V	0.0878	0.821	0.78
45	59	45_S	59_Q	0.0875	0.819	0.777
45	83	45_S	83_S	0.086	0.804	0.759
45	54	45_S	54_L	0.0858	0.802	0.756
46	114	46_A	114_T	0.0829	0.775	0.721
46	62	46_A	62_A	0.0793	0.742	0.673
47	50	47_E	50_I	0.0804	0.752	0.688
48	51	48_A	51_D	0.1102	1.031	0.937
49	53	49_R	53_V	0.0818	0.765	0.706
50	55	50_I	55_L	0.1507	1.409	0.995
51	55	51_D	55_L	0.1057	0.989	0.918
51	56	51_D	56_Q	0.0939	0.878	0.839
53	57	53_V	57_A	0.1309	1.224	0.983
53	56	53_V	56_Q	0.1069	1	0.924
54	57	54_L	57_A	0.0904	0.846	0.808
54	58	54_L	58_E	0.0892	0.835	0.796
54	92	54_L	92_T	0.0846	0.791	0.742
55	83	55_L	83_S	0.1055	0.987	0.917
55	58	55_L	58_E	0.0873	0.817	0.775
55	59	55_L	59_Q	0.0836	0.782	0.73
55	149	55_L	149_L	0.082	0.767	0.709
56	60	56_Q	60_Q	0.1309	1.225	0.983
56	59	56_Q	59_Q	0.105	0.982	0.914
56	76	56_Q	76_Q	0.0981	0.917	0.872
57	60	57_A	60_Q	0.3504	3.278	1
57	61	57_A	61_L	0.0887	0.83	0.79
58	67	58_E	67_I	0.0875	0.819	0.777
58	82	58_E	82_R	0.0781	0.73	0.654
59	62	59_Q	62_A	0.1837	1.719	0.999
59	64	59_Q	64_S	0.0863	0.807	0.763
59	143	59_Q	143_Q	0.0835	0.781	0.729
59	63	59_Q	63_R	0.0816	0.763	0.704
60	64	60_Q	64_S	0.1481	1.386	0.994
61	138	61_L	138_E	0.09	0.842	0.803
62	65	62_A	65_L	0.0979	0.915	0.871
62	66	62_A	66_Q	0.0926	0.866	0.828
62	69	62_A	69_K	0.0846	0.792	0.743
63	66	63_R	66_Q	0.1323	1.237	0.984
63	120	63_R	120_G	0.0803	0.751	0.686
64	168	64_S	168_Q	0.0898	0.84	0.801
65	81	65_L	81_Q	0.0821	0.768	0.711
66	69	66_Q	69_K	0.207	1.936	1
67	70	67_I	70_P	0.091	0.851	0.813
68	71	68_T	71_R	0.1087	1.017	0.931
69	114	69_K	114_T	0.1152	1.078	0.954
69	73	69_K	73_L	0.1012	0.947	0.894
70	74	70_P	74_E	0.1881	1.759	1
70	73	70_P	73_L	0.11	1.029	0.937
70	98	70_P	98_A	0.0854	0.799	0.752
70	113	70_P	113_T	0.0838	0.784	0.733
71	75	71_R	75_Q	0.1721	1.61	0.999
71	165	71_R	165_F	0.0806	0.754	0.691
72	76	72_L	76_Q	0.1282	1.199	0.979
72	157	72_L	157_Q	0.0856	0.8	0.754
73	77	73_L	77_Q	0.0867	0.811	0.768
73	76	73_L	76_Q	0.086	0.804	0.759
75	79	75_Q	79_R	0.1904	1.781	1
75	87	75_Q	87_R	0.0891	0.833	0.793
76	80	76_Q	80_E	0.0954	0.893	0.853
76	79	76_Q	79_R	0.0905	0.847	0.809
76	87	76_Q	87_R	0.0828	0.775	0.721
77	81	77_Q	81_Q	0.1443	1.35	0.993
77	80	77_Q	80_E	0.1076	1.006	0.926
77	90	77_Q	90_Q	0.0785	0.734	0.66
78	81	78_L	81_Q	0.1003	0.938	0.888
79	125	79_R	125_K	0.0918	0.859	0.821
79	82	79_R	82_R	0.0898	0.84	0.801
79	138	79_R	138_E	0.0888	0.83	0.79
79	130	79_R	130_S	0.0823	0.77	0.714
80	160	80_E	160_Q	0.0887	0.829	0.789
80	83	80_E	83_S	0.0838	0.784	0.733
80	97	80_E	97_S	0.0826	0.773	0.718
81	152	81_Q	152_R	0.0929	0.869	0.831
81	85	81_Q	85_R	0.0868	0.812	0.769
81	109	81_Q	109_H	0.08	0.749	0.683
82	86	82_R	86_Q	0.1253	1.172	0.975
82	127	82_R	127_L	0.0938	0.877	0.839
83	87	83_S	87_R	0.1651	1.545	0.998
83	143	83_S	143_Q	0.086	0.804	0.759
85	89	85_R	89_R	0.1107	1.036	0.939
85	88	85_R	88_Q	0.0799	0.747	0.68
86	93	86_Q	93_R	0.0893	0.835	0.796
88	92	88_Q	92_T	0.1714	1.603	0.999
89	137	89_R	137_L	0.1104	1.033	0.938
89	92	89_R	92_T	0.0896	0.838	0.799
90	151	90_Q	151_Q	0.0895	0.837	0.798
90	97	90_Q	97_S	0.0819	0.766	0.708
91	136	91_F	136_A	0.0833	0.779	0.726
92	152	92_T	152_R	0.082	0.767	0.709
94	169	94_D	169_L	0.0875	0.818	0.776
94	112	94_D	112_L	0.0813	0.76	0.699
95	98	95_W	98_A	0.1092	1.022	0.934
95	117	95_W	117_W	0.1018	0.952	0.897
95	155	95_W	155_T	0.0943	0.882	0.843
96	100	96_Q	100_E	0.1344	1.257	0.986
96	117	96_Q	117_W	0.1056	0.988	0.918
97	146	97_S	146_S	0.1006	0.941	0.89
97	167	97_S	167_Y	0.0878	0.821	0.78
98	147	98_A	147_F	0.0995	0.931	0.883
98	134	98_A	134_L	0.0949	0.888	0.849
98	131	98_A	131_I	0.0792	0.741	0.671
99	103	99_L	103_A	0.1036	0.969	0.907
99	138	99_L	138_E	0.1027	0.96	0.902
99	137	99_L	137_L	0.0946	0.885	0.846
99	102	99_L	102_L	0.0798	0.747	0.68
100	104	100_E	104_A	0.1285	1.202	0.98
100	138	100_E	138_E	0.1152	1.078	0.954
101	144	101_A	144_D	0.2271	2.124	1
101	105	101_A	105_L	0.1589	1.487	0.997
101	104	101_A	104_A	0.148	1.384	0.994
101	147	101_A	147_F	0.1069	1	0.924
101	145	101_A	145_A	0.1027	0.961	0.902
101	157	101_A	157_Q	0.0793	0.742	0.673
102	149	102_L	149_L	0.0921	0.861	0.823
103	157	103_A	157_Q	0.0863	0.807	0.763
105	141	105_L	141_L	0.1117	1.045	0.943
105	144	105_L	144_D	0.1106	1.034	0.939
105	146	105_L	146_S	0.0985	0.922	0.876
105	120	105_L	120_G	0.0857	0.802	0.756
106	137	106_L	137_L	0.145	1.357	0.993
106	112	106_L	112_L	0.1056	0.988	0.918
107	137	107_P	137_L	0.1997	1.868	1
109	133	109_H	133_A	0.244	2.282	1
109	129	109_H	129_T	0.104	0.973	0.909
110	126	110_A	126_G	0.13	1.217	0.982
110	128	110_A	128_T	0.1292	1.209	0.981
110	161	110_A	161_G	0.093	0.87	0.832
110	166	110_A	166_E	0.0907	0.849	0.811
110	158	110_A	158_D	0.0794	0.742	0.673
111	127	111_W	127_L	0.1356	1.269	0.987
111	129	111_W	129_T	0.0913	0.854	0.816
111	152	111_W	152_R	0.0823	0.77	0.714
112	137	112_L	137_L	0.1092	1.022	0.934
112	171	112_L	171_R	0.0982	0.919	0.874
112	122	112_L	122_L	0.095	0.888	0.849
112	126	112_L	126_G	0.091	0.851	0.813
114	125	114_T	125_K	0.1583	1.481	0.997
115	154	115_I	154_A	0.0987	0.924	0.878
115	160	115_I	160_Q	0.0905	0.846	0.808
115	149	115_I	149_L	0.0854	0.799	0.752
116	123	116_S	123_E	0.1094	1.024	0.934
117	122	117_W	122_L	0.0921	0.861	0.823
118	121	118_Q	121_T	0.1417	1.326	0.991
118	124	118_Q	124_I	0.0912	0.853	0.815
118	123	118_Q	123_E	0.0868	0.812	0.769
118	148	118_Q	148_H	0.079	0.739	0.668
120	159	120_G	159_A	0.0949	0.888	0.849
121	168	121_T	168_Q	0.0961	0.899	0.858
121	164	121_T	164_Q	0.0952	0.891	0.851
122	169	122_L	169_L	0.1815	1.698	0.999
122	155	122_L	155_T	0.094	0.879	0.84
122	156	122_L	156_Q	0.0785	0.735	0.662
123	166	123_E	166_E	0.161	1.506	0.997
123	143	123_E	143_Q	0.1004	0.939	0.888
124	141	124_I	141_L	0.0846	0.791	0.742
125	166	125_K	166_E	0.2552	2.387	1
125	164	125_K	164_Q	0.0882	0.825	0.784
125	147	125_K	147_F	0.0794	0.742	0.673
126	165	126_G	165_F	0.2975	2.783	1
126	134	126_G	134_L	0.1665	1.557	0.998
126	138	126_G	138_E	0.1148	1.074	0.953
126	152	126_G	152_R	0.0885	0.828	0.788
127	162	127_L	162_R	0.1202	1.125	0.966
127	164	127_L	164_Q	0.0958	0.896	0.855
128	134	128_T	134_L	0.1064	0.995	0.921
128	135	128_T	135_N	0.0914	0.855	0.817
128	163	128_T	163_W	0.0882	0.825	0.784
128	167	128_T	167_Y	0.0831	0.778	0.725
130	133	130_S	133_A	0.131	1.225	0.983
130	140	130_S	140_S	0.0842	0.787	0.737
131	155	131_I	155_T	0.1297	1.214	0.981
131	163	131_I	163_W	0.1181	1.105	0.961
131	138	131_I	138_E	0.1177	1.101	0.96
131	135	131_I	135_N	0.1109	1.037	0.94
131	152	131_I	152_R	0.0948	0.887	0.848
133	136	133_A	136_A	0.0957	0.895	0.855
134	157	134_L	157_Q	0.0876	0.82	0.778
134	163	134_L	163_W	0.0784	0.733	0.659
134	155	134_L	155_T	0.0778	0.728	0.651
135	138	135_N	138_E	0.0961	0.899	0.858
136	140	136_A	140_S	0.1255	1.174	0.976
137	141	137_L	141_L	0.1198	1.121	0.965
137	152	137_L	152_R	0.0794	0.742	0.673
138	152	138_E	152_R	0.1359	1.271	0.987
138	142	138_E	142_R	0.1215	1.136	0.969
138	167	138_E	167_Y	0.1006	0.941	0.89
140	143	140_S	143_Q	0.12	1.123	0.966
141	167	141_L	167_Y	0.1513	1.416	0.995
142	150	142_R	150_N	0.1204	1.126	0.966
142	153	142_R	153_G	0.0816	0.764	0.705
144	147	144_D	147_F	0.1028	0.962	0.903
147	169	147_F	169_L	0.0829	0.776	0.722
147	154	147_F	154_A	0.0804	0.752	0.688
148	172	148_H	172_K	0.1865	1.744	1
148	170	148_H	170_T	0.1119	1.047	0.943
149	170	149_L	170_T	0.2001	1.872	1
150	169	150_N	169_L	0.0781	0.731	0.656
151	168	151_Q	168_Q	0.1132	1.059	0.948
153	166	153_G	166_E	0.0776	0.726	0.648
154	166	154_A	166_E	0.0822	0.769	0.712
156	164	156_Q	164_Q	0.114	1.067	0.95
156	166	156_Q	166_E	0.0816	0.763	0.704
158	164	158_D	164_Q	0.1138	1.065	0.95
170	173	170_T	173_V	0.106	0.992	0.92
170	174	170_T	174_S	0.0825	0.772	0.716

## Sheet: LxpL
i	j	i_id	j_id	r_sco	s_sco	prob
10	13	10_A	13_H	0.1674	0.971	0.908
11	16	11_L	16_Y	0.1606	0.931	0.883
11	14	11_L	14_P	0.14	0.812	0.769
11	15	11_L	15_R	0.1268	0.736	0.664
11	305	11_L	305_R	0.0983	0.57	0.387
12	16	12_L	16_Y	0.1452	0.842	0.803
12	17	12_L	17_W	0.1068	0.619	0.469
13	16	13_H	16_Y	0.0998	0.579	0.402
14	17	14_P	17_W	0.219	1.27	0.987
14	20	14_P	20_W	0.1079	0.625	0.479
17	20	17_W	20_W	0.1719	0.997	0.922
18	158	18_L	158_N	0.1082	0.627	0.483
19	23	19_T	23_I	0.1176	0.682	0.576
19	160	19_T	160_L	0.0977	0.566	0.38
20	23	20_W	23_I	0.1177	0.683	0.578
20	24	20_W	24_G	0.1085	0.629	0.486
22	26	22_G	26_L	0.0983	0.57	0.387
23	164	23_I	164_L	0.195	1.131	0.967
23	27	23_I	27_W	0.1678	0.973	0.909
24	27	24_G	27_W	0.1057	0.613	0.459
24	28	24_G	28_L	0.1052	0.61	0.454
26	94	26_L	94_G	0.164	0.951	0.896
27	31	27_W	31_Q	0.2555	1.482	0.997
27	30	27_W	30_V	0.1301	0.754	0.691
28	32	28_L	32_L	0.1069	0.62	0.471
29	91	29_V	91_M	0.0996	0.578	0.4
30	98	30_V	98_F	0.1157	0.671	0.558
30	33	30_V	33_P	0.0985	0.571	0.388
31	36	31_Q	36_V	0.1523	0.883	0.844
32	40	32_L	40_L	0.1509	0.875	0.837
32	36	32_L	36_V	0.1246	0.722	0.642
32	35	32_L	35_P	0.1218	0.706	0.616
33	36	33_P	36_V	0.364	2.111	1
34	38	34_Y	38_Y	0.1669	0.968	0.907
35	39	35_P	39_R	0.2243	1.301	0.99
35	38	35_P	38_Y	0.1568	0.91	0.867
36	39	36_V	39_R	0.1615	0.937	0.887
37	91	37_I	91_M	0.2148	1.246	0.985
37	95	37_I	95_M	0.1525	0.885	0.846
38	88	38_Y	88_M	0.176	1.021	0.933
38	42	38_Y	42_C	0.1249	0.724	0.645
38	41	38_Y	41_G	0.1112	0.645	0.514
39	43	39_R	43_G	0.2507	1.454	0.996
39	42	39_R	42_C	0.2302	1.335	0.992
40	43	40_L	43_G	0.1348	0.782	0.73
40	91	40_L	91_M	0.1011	0.586	0.413
41	87	41_G	87_G	0.3817	2.214	1
41	45	41_G	45_G	0.1611	0.934	0.885
42	84	42_C	84_E	0.2721	1.578	0.998
42	88	42_C	88_M	0.2451	1.422	0.995
42	46	42_C	46_K	0.0998	0.579	0.402
43	47	43_G	47_L	0.2181	1.265	0.987
43	46	43_G	46_K	0.1517	0.88	0.841
43	84	43_G	84_E	0.099	0.574	0.393
44	87	44_L	87_G	0.1311	0.76	0.699
45	87	45_G	87_G	0.1286	0.746	0.679
45	49	45_G	49_L	0.125	0.725	0.647
45	50	45_G	50_R	0.1145	0.664	0.546
45	84	45_G	84_E	0.1121	0.65	0.522
46	84	46_K	84_E	0.4006	2.324	1
46	80	46_K	80_V	0.1674	0.971	0.908
46	49	46_K	49_L	0.1133	0.657	0.534
46	50	46_K	50_R	0.1072	0.622	0.474
46	77	46_K	77_K	0.0979	0.568	0.384
47	51	47_L	51_F	0.1632	0.947	0.894
49	80	49_L	80_V	0.2394	1.388	0.994
49	56	49_L	56_A	0.2066	1.198	0.979
49	79	49_L	79_V	0.1846	1.07	0.951
49	76	49_L	76_R	0.1368	0.793	0.745
49	60	49_L	60_H	0.1092	0.633	0.493
50	80	50_R	80_V	0.1581	0.917	0.872
50	76	50_R	76_R	0.1346	0.781	0.729
52	55	52_M	55_R	0.1422	0.825	0.784
53	56	53_K	56_A	0.2242	1.3	0.99
53	57	53_K	57_K	0.1282	0.744	0.676
54	58	54_R	58_I	0.1256	0.728	0.651
55	292	55_R	292_H	0.1618	0.938	0.888
55	58	55_R	58_I	0.1037	0.601	0.438
55	83	55_R	83_F	0.1017	0.59	0.42
55	296	55_R	296_K	0.0978	0.567	0.382
56	60	56_A	60_H	0.2032	1.179	0.976
56	83	56_A	83_F	0.1419	0.823	0.782
57	61	57_K	61_R	0.2045	1.186	0.977
57	60	57_K	60_H	0.0985	0.572	0.39
58	293	58_I	293_R	0.344	1.995	1
58	62	58_I	62_N	0.148	0.858	0.82
58	292	58_I	292_H	0.1277	0.741	0.671
58	67	58_I	67_F	0.1059	0.614	0.46
58	61	58_I	61_R	0.0996	0.578	0.4
59	79	59_V	79_V	0.3054	1.771	1
59	82	59_V	82_N	0.231	1.34	0.992
59	291	59_V	291_L	0.1652	0.958	0.901
59	63	59_V	63_L	0.1498	0.869	0.831
59	83	59_V	83_F	0.1181	0.685	0.582
60	79	60_H	79_V	0.5144	2.983	1
60	76	60_H	76_R	0.4442	2.576	1
60	64	60_H	64_E	0.2551	1.48	0.997
60	75	60_H	75_R	0.2327	1.349	0.993
60	72	60_H	72_E	0.102	0.592	0.423
61	64	61_R	64_E	0.2987	1.732	0.999
61	65	61_R	65_L	0.1602	0.929	0.881
61	216	61_R	216_V	0.1347	0.781	0.729
61	293	61_R	293_R	0.1169	0.678	0.57
61	296	61_R	296_K	0.1071	0.621	0.472
61	305	61_R	305_R	0.1019	0.591	0.422
62	214	62_N	214_F	0.1657	0.961	0.902
62	281	62_N	281_I	0.1646	0.955	0.899
62	66	62_N	66_C	0.1076	0.624	0.478
62	169	62_N	169_R	0.0987	0.573	0.392
63	75	63_L	75_R	0.4782	2.773	1
63	79	63_L	79_V	0.1668	0.968	0.907
63	70	63_L	70_M	0.1579	0.916	0.872
63	78	63_L	78_M	0.1307	0.758	0.696
63	66	63_L	66_C	0.0986	0.572	0.39
64	75	64_E	75_R	0.3479	2.018	1
64	72	64_E	72_E	0.3357	1.947	1
65	216	65_L	216_V	0.3608	2.093	1
65	214	65_L	214_F	0.1282	0.744	0.676
65	295	65_L	295_F	0.108	0.626	0.481
66	295	66_C	295_F	0.224	1.299	0.989
66	214	66_C	214_F	0.1555	0.902	0.86
66	75	66_C	75_R	0.114	0.661	0.541
67	70	67_F	70_M	0.3297	1.912	1
67	75	67_F	75_R	0.175	1.015	0.931
69	282	69_E	282_M	0.4068	2.359	1
70	74	70_M	74_E	0.4273	2.478	1
70	78	70_M	78_M	0.352	2.042	1
70	75	70_M	75_R	0.2438	1.414	0.995
71	74	71_S	74_E	0.4324	2.508	1
72	76	72_E	76_R	0.1118	0.649	0.52
74	78	74_E	78_M	0.2342	1.358	0.993
74	77	74_E	77_K	0.2003	1.161	0.973
76	79	76_R	79_V	0.0984	0.57	0.387
77	81	77_K	81_K	0.2309	1.339	0.992
78	286	78_M	286_E	0.1792	1.04	0.941
79	82	79_V	82_N	0.1197	0.694	0.596
80	84	80_V	84_E	0.1145	0.664	0.546
81	286	81_K	286_E	0.507	2.941	1
81	84	81_K	84_E	0.1168	0.678	0.57
82	291	82_N	291_L	0.1457	0.845	0.807
82	86	82_N	86_V	0.1223	0.709	0.621
82	289	82_N	289_M	0.1171	0.679	0.571
83	86	83_F	86_V	0.1237	0.718	0.635
85	88	85_S	88_M	0.157	0.91	0.867
85	287	85_S	287_Q	0.1372	0.796	0.749
85	286	85_S	286_E	0.1346	0.781	0.729
85	243	85_S	243_R	0.1235	0.716	0.632
85	135	85_S	135_T	0.1101	0.639	0.503
85	92	85_S	92_E	0.0966	0.56	0.371
86	291	86_V	291_L	0.1628	0.944	0.892
86	289	86_V	289_M	0.1073	0.622	0.474
86	89	86_V	89_G	0.0982	0.57	0.387
87	90	87_G	90_L	0.1647	0.955	0.899
87	91	87_G	91_M	0.1157	0.671	0.558
88	92	88_M	92_E	0.1492	0.865	0.827
88	243	88_M	243_R	0.1186	0.688	0.587
88	246	88_M	246_D	0.1009	0.585	0.412
89	130	89_G	130_G	0.1092	0.633	0.493
92	243	92_E	243_R	0.3299	1.913	1
92	135	92_E	135_T	0.1316	0.763	0.704
93	185	93_T	185_M	0.0996	0.578	0.4
95	136	95_M	136_L	0.099	0.574	0.393
96	196	96_A	196_W	0.1134	0.657	0.534
99	103	99_W	103_R	0.1496	0.868	0.83
100	103	100_P	103_R	0.108	0.626	0.481
101	105	101_D	105_A	0.2002	1.161	0.973
101	141	101_D	141_R	0.1091	0.633	0.493
103	107	103_R	107_W	0.1529	0.887	0.848
105	145	105_A	145_M	0.1419	0.823	0.782
108	142	108_T	142_Q	0.116	0.673	0.561
109	251	109_E	251_Q	0.5846	3.39	1
109	249	109_E	249_G	0.2826	1.639	0.999
109	244	109_E	244_K	0.1579	0.916	0.872
110	142	110_V	142_Q	0.1401	0.812	0.769
110	113	110_V	113_M	0.1284	0.745	0.677
110	254	110_V	254_M	0.098	0.569	0.385
111	251	111_I	251_Q	0.6224	3.61	1
111	253	111_I	253_I	0.5337	3.095	1
112	115	112_G	115_H	0.3768	2.186	1
112	254	112_G	254_M	0.147	0.853	0.815
112	256	112_G	256_P	0.1312	0.761	0.701
112	119	112_G	119_V	0.1086	0.63	0.488
113	117	113_M	117_R	0.3186	1.848	1
113	116	113_M	116_I	0.1207	0.7	0.606
114	118	114_E	118_D	0.3407	1.976	1
114	117	114_E	117_R	0.1091	0.633	0.493
115	256	115_H	256_P	0.4326	2.509	1
115	237	115_H	237_V	0.2941	1.706	0.999
115	118	115_H	118_D	0.2822	1.636	0.999
115	119	115_H	119_V	0.1838	1.066	0.95
115	257	115_H	257_P	0.1065	0.618	0.467
116	126	116_I	126_I	0.1357	0.787	0.737
116	128	116_I	128_L	0.1149	0.666	0.549
117	121	117_R	121_A	0.2931	1.7	0.999
117	120	117_R	120_Q	0.1433	0.831	0.791
118	122	118_D	122_Q	0.2621	1.52	0.998
118	121	118_D	121_A	0.1726	1.001	0.924
119	237	119_V	237_V	0.2154	1.249	0.985
119	126	119_V	126_I	0.1558	0.904	0.862
119	122	119_V	122_Q	0.1475	0.855	0.817
120	192	120_Q	192_G	0.11	0.638	0.502
122	235	122_Q	235_C	0.1836	1.065	0.95
123	192	123_K	192_G	0.136	0.789	0.739
124	235	124_R	235_C	0.3027	1.756	1
124	233	124_R	233_G	0.1924	1.116	0.964
125	234	125_G	234_A	0.1679	0.974	0.91
125	193	125_G	193_E	0.166	0.963	0.904
125	189	125_G	189_L	0.1406	0.816	0.774
125	235	125_G	235_C	0.1129	0.655	0.531
125	232	125_G	232_S	0.1106	0.642	0.508
125	192	125_G	192_G	0.1027	0.596	0.43
125	195	125_G	195_V	0.0984	0.571	0.388
125	233	125_G	233_G	0.0984	0.57	0.387
126	235	126_I	235_C	0.2523	1.463	0.997
126	194	126_I	194_V	0.2278	1.321	0.991
126	237	126_I	237_V	0.1031	0.598	0.433
127	234	127_L	234_A	0.2013	1.168	0.975
127	228	127_L	228_L	0.1399	0.812	0.769
127	195	127_L	195_V	0.1303	0.756	0.694
127	225	127_L	225_T	0.0968	0.562	0.374
128	239	128_L	239_F	0.2027	1.175	0.976
128	194	128_L	194_V	0.179	1.038	0.94
129	273	129_V	273_M	0.1805	1.047	0.943
129	199	129_V	199_P	0.1634	0.948	0.894
129	277	129_V	277_V	0.1075	0.623	0.476
130	196	130_G	196_W	0.1302	0.755	0.692
130	241	130_G	241_P	0.1054	0.611	0.455
131	277	131_I	277_V	0.2368	1.373	0.994
131	199	131_I	199_P	0.1309	0.759	0.698
131	198	131_I	198_A	0.1135	0.658	0.536
131	273	131_I	273_M	0.107	0.621	0.472
131	221	131_I	221_T	0.1059	0.614	0.46
131	240	131_I	240_V	0.097	0.563	0.375
133	287	133_F	287_Q	0.173	1.003	0.925
133	284	133_F	284_A	0.1404	0.814	0.771
133	280	133_F	280_C	0.132	0.765	0.706
134	197	134_L	197_Y	0.1135	0.658	0.536
134	198	134_L	198_A	0.1098	0.637	0.5
134	241	134_L	241_P	0.1042	0.604	0.443
135	201	135_T	201_H	0.1187	0.688	0.587
135	288	135_T	288_Y	0.1167	0.677	0.568
136	198	136_L	198_A	0.1691	0.98	0.913
136	169	136_L	169_R	0.1159	0.672	0.56
136	196	136_L	196_W	0.1095	0.635	0.496
137	169	137_E	169_R	0.1623	0.941	0.89
137	196	137_E	196_W	0.1228	0.712	0.626
137	201	137_E	201_H	0.113	0.655	0.531
137	151	137_E	151_G	0.1128	0.654	0.529
138	241	138_L	241_P	0.1053	0.611	0.455
139	198	139_G	198_A	0.1389	0.806	0.761
139	196	139_G	196_W	0.1135	0.658	0.536
139	239	139_G	239_F	0.1049	0.608	0.45
140	151	140_A	151_G	0.1633	0.947	0.894
140	202	140_A	202_D	0.1336	0.775	0.721
140	169	140_A	169_R	0.1241	0.72	0.639
140	196	140_A	196_W	0.0992	0.576	0.397
143	149	143_F	149_G	0.1169	0.678	0.57
143	254	143_F	254_M	0.0977	0.567	0.382
146	192	146_Q	192_G	0.1352	0.784	0.733
148	193	148_P	193_E	0.1313	0.761	0.701
148	175	148_P	175_S	0.1052	0.61	0.454
150	193	150_I	193_E	0.4037	2.342	1
150	177	150_I	177_L	0.2331	1.352	0.993
150	188	150_I	188_A	0.2303	1.336	0.992
150	175	150_I	175_S	0.1543	0.895	0.855
150	197	150_I	197_Y	0.0966	0.56	0.371
151	176	151_G	176_M	0.1363	0.791	0.742
151	174	151_G	174_K	0.1123	0.651	0.524
152	185	152_V	185_M	0.1889	1.095	0.959
152	197	152_V	197_Y	0.1159	0.672	0.56
153	176	153_Y	176_M	0.2567	1.489	0.997
153	162	153_Y	162_D	0.1115	0.647	0.517
153	178	153_Y	178_D	0.1062	0.616	0.464
153	242	153_Y	242_R	0.1061	0.615	0.462
154	157	154_R	157_D	0.2499	1.449	0.996
154	179	154_R	179_R	0.134	0.777	0.723
154	201	154_R	201_H	0.1234	0.716	0.632
154	290	154_R	290_W	0.1186	0.688	0.587
154	203	154_R	203_Y	0.1024	0.594	0.427
155	178	155_P	178_D	0.379	2.198	1
155	159	155_P	159_P	0.1009	0.585	0.412
156	165	156_N	165_Q	0.1826	1.059	0.948
156	162	156_N	162_D	0.125	0.725	0.647
158	161	158_N	161_I	0.0971	0.563	0.375
162	166	162_D	166_T	0.2054	1.191	0.978
163	167	163_W	167_W	0.2467	1.431	0.996
166	170	166_T	170_L	0.181	1.05	0.945
166	176	166_T	176_M	0.1066	0.618	0.467
170	176	170_L	176_M	0.1407	0.816	0.774
170	175	170_L	175_S	0.1314	0.762	0.702
175	193	175_S	193_E	0.2117	1.228	0.983
175	184	175_S	184_G	0.1661	0.963	0.904
175	188	175_S	188_A	0.1525	0.884	0.845
177	188	177_L	188_A	0.1286	0.746	0.679
177	184	177_L	184_G	0.1208	0.7	0.606
177	195	177_L	195_V	0.1195	0.693	0.595
179	292	179_R	292_H	0.1163	0.675	0.565
179	208	179_R	208_S	0.1047	0.607	0.449
179	183	179_R	183_K	0.0964	0.559	0.369
181	186	181_D	186_I	0.1195	0.693	0.595
183	186	183_K	186_I	0.1998	1.159	0.973
183	227	183_K	227_M	0.1248	0.724	0.645
184	187	184_G	187_K	0.1765	1.024	0.934
184	188	184_G	188_A	0.1314	0.762	0.702
185	195	185_M	195_V	0.2171	1.259	0.986
185	228	185_M	228_L	0.2022	1.173	0.975
185	192	185_M	192_G	0.1033	0.599	0.435
186	190	186_I	190_K	0.2218	1.286	0.989
186	231	186_I	231_M	0.1392	0.807	0.763
187	191	187_K	191_K	0.1739	1.009	0.928
188	193	188_A	193_E	0.4298	2.493	1
188	195	188_A	195_V	0.1569	0.91	0.867
189	195	189_L	195_V	0.1267	0.735	0.662
189	232	189_L	232_S	0.1153	0.669	0.555
189	192	189_L	192_G	0.1014	0.588	0.417
190	275	190_K	275_K	0.0976	0.566	0.38
197	223	197_Y	223_T	0.1201	0.696	0.6
199	225	199_P	225_T	0.1507	0.874	0.836
201	292	201_H	292_H	0.2006	1.163	0.974
201	290	201_H	290_W	0.1677	0.972	0.909
201	294	201_H	294_R	0.1614	0.936	0.886
201	289	201_H	289_M	0.1436	0.833	0.793
202	297	202_D	297_T	0.1795	1.041	0.941
202	210	202_D	210_F	0.1457	0.845	0.807
202	219	202_D	219_A	0.1237	0.718	0.635
202	296	202_D	296_K	0.1072	0.622	0.474
203	221	203_Y	221_T	0.14	0.812	0.769
203	219	203_Y	219_A	0.1257	0.729	0.653
208	219	208_S	219_A	0.1603	0.93	0.882
209	270	209_V	270_A	0.3085	1.789	1
209	267	209_V	267_E	0.2049	1.188	0.978
209	222	209_V	222_T	0.137	0.795	0.747
209	271	209_V	271_A	0.1027	0.595	0.428
210	217	210_F	217_E	0.2967	1.721	0.999
210	219	210_F	219_A	0.2259	1.31	0.99
210	299	210_F	299_P	0.223	1.293	0.989
210	297	210_F	297_T	0.1957	1.135	0.968
210	298	210_F	298_R	0.13	0.754	0.691
211	271	211_V	271_A	0.3297	1.912	1
211	274	211_V	274_N	0.271	1.572	0.998
211	270	211_V	270_A	0.1603	0.93	0.882
211	267	211_V	267_E	0.1352	0.784	0.733
211	220	211_V	220_A	0.1158	0.671	0.558
212	271	212_P	271_A	0.4819	2.795	1
212	217	212_P	217_E	0.4576	2.654	1
212	275	212_P	275_K	0.2516	1.459	0.996
212	215	212_P	215_A	0.1746	1.013	0.93
212	220	212_P	220_A	0.1014	0.588	0.417
212	278	212_P	278_E	0.101	0.586	0.413
213	281	213_L	281_I	0.108	0.626	0.481
214	278	214_F	278_E	0.3671	2.129	1
214	282	214_F	282_M	0.2392	1.387	0.994
214	281	214_F	281_I	0.1123	0.651	0.524
216	298	216_V	298_R	0.1867	1.083	0.955
216	297	216_V	297_T	0.1164	0.675	0.565
217	299	217_E	299_P	0.1709	0.991	0.919
218	294	218_Q	294_R	0.1792	1.039	0.94
218	295	218_Q	295_F	0.1679	0.974	0.91
218	223	218_Q	223_T	0.0996	0.578	0.4
219	297	219_A	297_T	0.15	0.87	0.832
219	299	219_A	299_P	0.0993	0.576	0.397
220	274	220_A	274_N	0.3261	1.891	1
220	294	220_A	294_R	0.126	0.73	0.654
222	227	222_T	227_M	0.1059	0.614	0.46
225	236	225_T	236_L	0.1483	0.86	0.822
225	273	225_T	273_M	0.1305	0.757	0.695
226	270	226_W	270_A	0.1856	1.077	0.954
226	269	226_W	269_T	0.1136	0.659	0.538
226	230	226_W	230_R	0.1128	0.654	0.529
226	261	226_W	261_P	0.0992	0.575	0.395
227	231	227_M	231_M	0.1296	0.752	0.688
228	232	228_L	232_S	0.1212	0.703	0.611
229	236	229_A	236_L	0.2165	1.256	0.986
230	269	230_R	269_T	0.1741	1.01	0.928
234	237	234_A	237_V	0.0981	0.569	0.385
235	257	235_C	257_P	0.1575	0.913	0.869
235	238	235_C	238_P	0.0991	0.575	0.395
236	269	236_L	269_T	0.1026	0.595	0.428
237	254	237_V	254_M	0.2338	1.356	0.993
238	255	238_P	255_L	0.3342	1.938	1
238	257	238_P	257_P	0.2467	1.431	0.996
238	276	238_P	276_V	0.2344	1.359	0.993
238	258	238_P	258_E	0.1329	0.771	0.715
238	256	238_P	256_P	0.1181	0.685	0.582
239	254	239_F	254_M	0.1188	0.689	0.588
240	280	240_V	280_C	0.2044	1.185	0.977
240	276	240_V	276_V	0.1923	1.115	0.964
240	255	240_V	255_L	0.1881	1.091	0.958
240	283	240_V	283_M	0.1209	0.701	0.608
240	253	240_V	253_I	0.1172	0.68	0.573
242	284	242_R	284_A	0.3383	1.962	1
242	251	242_R	251_Q	0.2935	1.703	0.999
242	253	242_R	253_I	0.2692	1.561	0.998
242	283	242_R	283_M	0.0987	0.573	0.392
243	287	243_R	287_Q	0.2026	1.175	0.976
243	250	243_R	250_Y	0.1139	0.66	0.539
244	251	244_K	251_Q	0.5111	2.964	1
244	249	244_K	249_G	0.1825	1.058	0.947
244	283	244_K	283_M	0.1064	0.617	0.466
245	249	245_P	249_G	0.1645	0.954	0.898
245	248	245_P	248_K	0.146	0.847	0.809
246	249	246_D	249_G	0.151	0.876	0.838
253	283	253_I	283_M	0.2065	1.198	0.979
253	280	253_I	280_C	0.1002	0.581	0.405
255	276	255_L	276_V	0.2464	1.429	0.996
255	279	255_L	279_K	0.1976	1.146	0.971
255	283	255_L	283_M	0.1502	0.871	0.833
255	280	255_L	280_C	0.1265	0.734	0.66
256	259	256_P	259_C	0.1638	0.95	0.896
258	272	258_E	272_W	0.0977	0.567	0.382
260	263	260_S	263_L	0.1051	0.61	0.454
260	269	260_S	269_T	0.0967	0.561	0.372
261	269	261_P	269_T	0.1245	0.722	0.642
263	269	263_L	269_T	0.1565	0.908	0.865
264	268	264_D	268_T	0.1132	0.656	0.532
265	268	265_D	268_T	0.3255	1.888	1
266	270	266_A	270_A	0.1722	0.999	0.923
267	271	267_E	271_A	0.277	1.606	0.999
268	272	268_T	272_W	0.1517	0.88	0.841
268	271	268_T	271_A	0.1341	0.778	0.725
269	272	269_T	272_W	0.1244	0.721	0.64
271	275	271_A	275_K	0.6639	3.85	1
272	275	272_W	275_K	0.192	1.114	0.964
272	276	272_W	276_V	0.1709	0.991	0.919
273	277	273_M	277_V	0.1231	0.714	0.629
275	278	275_K	278_E	0.4239	2.458	1
275	279	275_K	279_K	0.1584	0.919	0.874
276	279	276_V	279_K	0.2505	1.453	0.996
276	280	276_V	280_C	0.1908	1.107	0.962
277	281	277_V	281_I	0.1821	1.056	0.947
278	282	278_E	282_M	0.1857	1.077	0.954
279	282	279_K	282_M	0.1629	0.945	0.892
280	283	280_C	283_M	0.1647	0.955	0.899
284	287	284_A	287_Q	0.1671	0.969	0.907
288	295	288_Y	295_F	0.1393	0.808	0.764
289	292	289_M	292_H	0.1045	0.606	0.447
290	294	290_W	294_R	0.209	1.212	0.981
290	296	290_W	296_K	0.1172	0.68	0.573
290	295	290_W	295_F	0.0973	0.564	0.377
292	296	292_H	296_K	0.1564	0.907	0.865
296	299	296_K	299_P	0.1012	0.587	0.415
298	302	298_R	302_V	0.1061	0.615	0.462
302	305	302_V	305_R	0.1441	0.836	0.797
303	306	303_P	306_Y	0.1161	0.674	0.563

## Sheet: LpxM 
i	j	i_id	j_id	r_sco	s_sco	prob
17	20	17_S	20_H	0.1649	0.97	0.908
18	23	18_F	23_Y	0.1635	0.961	0.902
18	21	18_F	21_P	0.1467	0.862	0.824
18	22	18_F	22_R	0.1211	0.712	0.626
18	24	18_F	24_W	0.1161	0.683	0.578
19	23	19_R	23_Y	0.1467	0.862	0.824
19	24	19_R	24_W	0.1271	0.747	0.68
19	27	19_R	27_W	0.1017	0.598	0.433
21	24	21_P	24_W	0.2372	1.394	0.995
21	27	21_P	27_W	0.1155	0.679	0.571
21	25	21_P	25_G	0.1154	0.678	0.57
22	27	22_R	27_W	0.1023	0.602	0.44
23	27	23_Y	27_W	0.117	0.688	0.587
24	27	24_W	27_W	0.1697	0.997	0.922
27	31	27_W	31_A	0.0958	0.563	0.375
28	31	28_L	31_A	0.0996	0.586	0.413
29	33	29_G	33_M	0.0988	0.581	0.405
30	172	30_V	172_V	0.1951	1.147	0.971
30	34	30_V	34_A	0.1568	0.922	0.876
31	34	31_A	34_A	0.1007	0.592	0.423
33	101	33_M	101_A	0.1594	0.937	0.887
34	38	34_A	38_L	0.2537	1.491	0.997
34	37	34_A	37_A	0.1296	0.762	0.702
35	39	35_G	39_T	0.1047	0.616	0.464
36	98	36_I	98_A	0.0964	0.567	0.382
37	105	37_A	105_I	0.1094	0.643	0.51
37	40	37_A	40_P	0.097	0.57	0.387
38	43	38_L	43_F	0.1528	0.898	0.857
38	67	38_L	67_L	0.0996	0.586	0.413
39	47	39_T	47_I	0.1577	0.927	0.88
39	43	39_T	43_F	0.1213	0.713	0.627
39	42	39_T	42_K	0.115	0.676	0.566
40	43	40_P	43_F	0.3679	2.163	1
41	45	41_P	45_D	0.1636	0.962	0.903
41	102	41_P	102_E	0.0959	0.564	0.377
42	46	42_K	46_P	0.2039	1.198	0.979
42	45	42_K	45_D	0.1536	0.903	0.861
43	46	43_F	46_P	0.1604	0.943	0.891
44	98	44_R	98_A	0.2152	1.265	0.987
44	102	44_R	102_E	0.1443	0.848	0.81
45	95	45_D	95_Q	0.1823	1.072	0.952
45	49	45_D	49_A	0.1207	0.71	0.623
45	48	45_D	48_L	0.1048	0.616	0.464
46	50	46_P	50_R	0.2387	1.403	0.995
46	49	46_P	49_A	0.2217	1.303	0.99
47	50	47_I	50_R	0.1326	0.78	0.727
47	98	47_I	98_A	0.1008	0.593	0.425
48	94	48_L	94_P	0.3788	2.227	1
48	52	48_L	52_G	0.1619	0.952	0.897
49	91	49_A	91_A	0.2714	1.596	0.999
49	95	49_A	95_Q	0.2345	1.379	0.994
49	53	49_A	53_R	0.0958	0.563	0.375
50	54	50_R	54_F	0.2036	1.197	0.979
50	53	50_R	53_R	0.1465	0.861	0.823
50	91	50_R	91_A	0.1013	0.596	0.43
51	94	51_L	94_P	0.132	0.776	0.722
52	56	52_G	56_G	0.1264	0.743	0.674
52	94	52_G	94_P	0.1258	0.74	0.67
52	91	52_G	91_A	0.1158	0.681	0.575
53	91	53_R	91_A	0.3902	2.294	1
53	87	53_R	87_D	0.1705	1.002	0.925
53	56	53_R	56_G	0.1126	0.662	0.543
54	58	54_F	58_L	0.1805	1.061	0.948
56	87	56_G	87_D	0.232	1.364	0.993
56	63	56_G	63_R	0.2143	1.26	0.986
56	86	56_G	86_V	0.183	1.076	0.953
56	83	56_G	83_E	0.1392	0.818	0.776
56	67	56_G	67_L	0.1181	0.694	0.596
56	90	56_G	90_F	0.1021	0.6	0.437
57	87	57_R	87_D	0.1647	0.968	0.907
57	83	57_R	83_E	0.1397	0.821	0.78
59	62	59_G	62_S	0.1274	0.749	0.683
60	63	60_K	63_R	0.2273	1.336	0.992
60	64	60_K	64_R	0.1191	0.7	0.606
61	65	61_S	65_R	0.1129	0.664	0.546
62	300	62_S	300_L	0.1641	0.964	0.904
62	65	62_S	65_R	0.1123	0.66	0.539
62	304	62_S	304_K	0.0994	0.584	0.41
63	67	63_R	67_L	0.1921	1.129	0.967
63	90	63_R	90_F	0.1509	0.887	0.848
64	68	64_R	68_I	0.2024	1.19	0.978
64	67	64_R	67_L	0.1004	0.59	0.42
65	301	65_R	301_K	0.3469	2.039	1
65	69	65_R	69_N	0.1463	0.86	0.822
65	300	65_R	300_L	0.1273	0.749	0.683
65	68	65_R	68_I	0.1051	0.618	0.467
65	74	65_R	74_F	0.1004	0.59	0.42
66	86	66_A	86_V	0.3061	1.799	1
66	89	66_A	89_M	0.2233	1.313	0.99
66	299	66_A	299_I	0.1653	0.971	0.908
66	70	66_A	70_L	0.1494	0.878	0.839
66	90	66_A	90_F	0.1174	0.69	0.59
67	86	67_L	86_V	0.5071	2.981	1
67	83	67_L	83_E	0.4344	2.554	1
67	71	67_L	71_S	0.2491	1.464	0.997
67	82	67_L	82_R	0.237	1.393	0.994
67	79	67_L	79_E	0.1019	0.599	0.435
68	71	68_I	71_S	0.2984	1.754	1
68	72	68_I	72_L	0.1601	0.941	0.89
68	225	68_I	225_T	0.1371	0.806	0.761
68	301	68_I	301_K	0.1186	0.697	0.601
68	313	68_I	313_P	0.1045	0.614	0.46
68	304	68_I	304_K	0.1021	0.6	0.437
69	223	69_N	223_F	0.1796	1.056	0.947
69	289	69_N	289_V	0.1609	0.946	0.893
69	73	69_N	73_C	0.1122	0.66	0.539
70	82	70_L	82_R	0.4818	2.832	1
70	86	70_L	86_V	0.1563	0.919	0.874
70	77	70_L	77_R	0.1556	0.915	0.871
70	85	70_L	85_I	0.1408	0.828	0.788
70	73	70_L	73_C	0.0988	0.581	0.405
71	82	71_S	82_R	0.3492	2.053	1
71	79	71_S	79_E	0.3343	1.965	1
72	225	72_L	225_T	0.3563	2.094	1
72	223	72_L	223_F	0.1332	0.783	0.731
72	303	72_L	303_L	0.0983	0.578	0.4
73	303	73_C	303_L	0.2279	1.34	0.992
73	223	73_C	223_F	0.1603	0.942	0.89
73	82	73_C	82_R	0.1101	0.647	0.517
73	296	73_C	296_Y	0.0978	0.575	0.395
74	77	74_F	77_R	0.3269	1.922	1
74	82	74_F	82_R	0.1695	0.997	0.922
75	82	75_P	82_R	0.097	0.57	0.387
76	290	76_E	290_G	0.4115	2.419	1
77	81	77_R	81_E	0.4225	2.484	1
77	85	77_R	85_I	0.3548	2.086	1
77	82	77_R	82_R	0.2439	1.434	0.996
78	81	78_S	81_E	0.4456	2.62	1
79	83	79_E	83_E	0.1168	0.687	0.585
80	84	80_A	84_A	0.0989	0.581	0.405
81	85	81_E	85_I	0.2257	1.327	0.991
81	84	81_E	84_A	0.1981	1.164	0.974
83	86	83_E	86_V	0.0984	0.578	0.4
84	88	84_A	88_E	0.2494	1.466	0.997
85	294	85_I	294_E	0.1837	1.08	0.954
85	89	85_I	89_M	0.0982	0.577	0.398
86	89	86_V	89_M	0.114	0.67	0.556
87	91	87_D	91_A	0.114	0.67	0.556
88	294	88_E	294_E	0.5128	3.014	1
88	91	88_E	91_A	0.1147	0.674	0.563
89	299	89_M	299_I	0.1464	0.86	0.822
89	93	89_M	93_A	0.1217	0.715	0.631
89	297	89_M	297_T	0.1101	0.647	0.517
90	93	90_F	93_A	0.1157	0.68	0.573
92	95	92_T	95_Q	0.1552	0.913	0.869
92	294	92_T	294_E	0.1379	0.811	0.768
92	295	92_T	295_Q	0.1369	0.805	0.76
92	251	92_T	251_Y	0.1208	0.71	0.623
92	142	92_T	142_A	0.1086	0.639	0.503
93	299	93_A	299_I	0.1619	0.952	0.897
93	297	93_A	297_T	0.1061	0.624	0.478
93	96	93_A	96_A	0.101	0.594	0.427
94	97	94_P	97_M	0.1661	0.976	0.911
94	98	94_P	98_A	0.1107	0.651	0.524
95	99	95_Q	99_M	0.1528	0.898	0.857
95	251	95_Q	251_Y	0.1172	0.689	0.588
96	137	96_A	137_V	0.0996	0.585	0.412
99	251	99_M	251_Y	0.3319	1.951	1
99	142	99_M	142_A	0.1295	0.761	0.701
99	258	99_M	258_L	0.0969	0.57	0.387
100	194	100_M	194_F	0.097	0.57	0.387
103	205	103_L	205_Y	0.1089	0.64	0.505
106	110	106_R	110_K	0.1511	0.888	0.849
107	110	107_G	110_K	0.1007	0.592	0.423
108	112	108_P	112_Q	0.1828	1.075	0.953
108	148	108_P	148_M	0.103	0.605	0.445
110	114	110_K	114_R	0.1425	0.838	0.799
112	152	112_Q	152_S	0.143	0.841	0.802
112	153	112_Q	153_Q	0.1095	0.644	0.512
115	260	115_V	260_I	0.1122	0.66	0.539
115	149	115_V	149_L	0.1113	0.654	0.529
116	259	116_D	259_T	0.5807	3.414	1
116	257	116_D	257_R	0.28	1.646	0.999
116	252	116_D	252_D	0.1534	0.902	0.86
117	149	117_W	149_L	0.1403	0.825	0.784
117	120	117_W	120_L	0.1266	0.744	0.676
117	123	117_W	123_I	0.1025	0.603	0.442
118	259	118_Q	259_T	0.6237	3.666	1
118	261	118_Q	261_Q	0.5292	3.111	1
119	122	119_G	122_I	0.3849	2.263	1
119	262	119_G	262_V	0.1398	0.822	0.781
119	264	119_G	264_P	0.1394	0.82	0.778
119	126	119_G	126_M	0.1014	0.596	0.43
120	124	120_L	124_E	0.3227	1.897	1
120	123	120_L	123_I	0.1274	0.749	0.683
121	125	121_E	125_E	0.3427	2.014	1
121	124	121_E	124_E	0.1125	0.662	0.543
122	264	122_I	264_P	0.4338	2.55	1
122	245	122_I	245_V	0.2908	1.71	0.999
122	125	122_I	125_E	0.273	1.605	0.999
122	126	122_I	126_M	0.1771	1.041	0.941
122	265	122_I	265_P	0.1085	0.638	0.502
123	133	123_I	133_V	0.1322	0.777	0.723
123	135	123_I	135_F	0.1034	0.608	0.45
124	128	124_E	128_R	0.2945	1.731	0.999
124	127	124_E	127_R	0.1476	0.868	0.83
125	129	125_E	129_N	0.2588	1.521	0.998
125	128	125_E	128_R	0.1632	0.959	0.901
126	245	126_M	245_V	0.2065	1.214	0.981
126	133	126_M	133_V	0.1515	0.891	0.851
126	129	126_M	129_N	0.1465	0.861	0.823
127	201	127_R	201_G	0.1175	0.691	0.592
129	243	129_N	243_R	0.177	1.041	0.941
130	201	130_N	201_G	0.1251	0.736	0.664
131	243	131_E	243_R	0.3137	1.844	1
131	241	131_E	241_R	0.1933	1.136	0.969
132	202	132_K	202_Y	0.1608	0.945	0.892
132	242	132_K	242_A	0.1592	0.936	0.886
132	198	132_K	198_V	0.1385	0.814	0.771
132	243	132_K	243_R	0.1169	0.687	0.585
132	240	132_K	240_C	0.1069	0.629	0.486
132	241	132_K	241_R	0.1063	0.625	0.479
132	201	132_K	201_G	0.103	0.606	0.447
132	204	132_K	204_G	0.0992	0.583	0.408
133	243	133_V	243_R	0.2533	1.489	0.997
133	203	133_V	203_W	0.2271	1.335	0.992
133	245	133_V	245_V	0.1053	0.619	0.469
134	242	134_I	242_A	0.2116	1.244	0.985
134	236	134_I	236_L	0.1361	0.8	0.754
134	204	134_I	204_G	0.123	0.723	0.643
134	233	134_I	233_I	0.0994	0.584	0.41
134	206	134_I	206_Y	0.0976	0.574	0.393
134	244	134_I	244_V	0.0949	0.558	0.367
135	247	135_F	247_L	0.1998	1.174	0.976
135	203	135_F	203_W	0.1794	1.055	0.946
136	281	136_L	281_M	0.158	0.929	0.881
136	208	136_L	208_P	0.1549	0.91	0.867
136	285	136_L	285_V	0.1084	0.637	0.5
137	205	137_V	205_Y	0.1326	0.78	0.727
137	249	137_V	249_P	0.103	0.606	0.447
138	285	138_P	285_V	0.2248	1.321	0.991
138	208	138_P	208_P	0.133	0.782	0.73
138	281	138_P	281_M	0.1199	0.705	0.615
138	207	138_P	207_L	0.1074	0.631	0.49
138	230	138_P	230_L	0.0989	0.581	0.405
140	295	140_G	295_Q	0.1663	0.977	0.912
140	292	140_G	292_R	0.1384	0.814	0.771
140	288	140_G	288_F	0.1314	0.772	0.716
141	206	141_W	206_Y	0.1133	0.666	0.549
141	249	141_W	249_P	0.106	0.623	0.476
141	207	141_W	207_L	0.0986	0.58	0.403
142	210	142_A	210_Q	0.1165	0.685	0.582
142	296	142_A	296_Y	0.113	0.664	0.546
142	251	142_A	251_Y	0.1008	0.592	0.423
143	207	143_V	207_L	0.1681	0.988	0.918
143	177	143_V	177_R	0.1108	0.651	0.524
143	205	143_V	205_Y	0.103	0.605	0.445
144	177	144_D	177_R	0.1557	0.916	0.872
144	205	144_D	205_Y	0.1239	0.728	0.651
144	159	144_D	159_A	0.1099	0.646	0.515
144	210	144_D	210_Q	0.1085	0.638	0.502
145	249	145_I	249_P	0.1017	0.598	0.433
146	207	146_P	207_L	0.1333	0.783	0.731
146	205	146_P	205_Y	0.1182	0.695	0.598
146	247	146_P	247_L	0.0998	0.587	0.415
147	159	147_A	159_A	0.16	0.94	0.889
147	211	147_A	211_D	0.1348	0.793	0.745
147	177	147_A	177_R	0.1221	0.717	0.634
147	205	147_A	205_Y	0.0984	0.578	0.4
150	157	150_M	157_M	0.1135	0.667	0.551
154	201	154_G	201_G	0.1198	0.704	0.613
156	202	156_K	202_Y	0.1266	0.744	0.676
156	183	156_K	183_R	0.1001	0.588	0.417
157	203	157_M	203_W	0.0972	0.571	0.388
158	202	158_A	202_Y	0.3997	2.35	1
158	197	158_A	197_S	0.2375	1.396	0.995
158	185	158_A	185_H	0.2367	1.391	0.994
158	183	158_A	183_R	0.1568	0.922	0.876
159	184	159_A	184_L	0.1409	0.828	0.788
159	182	159_A	182_G	0.1129	0.663	0.544
160	194	160_M	194_F	0.1803	1.06	0.948
160	206	160_M	206_Y	0.1126	0.662	0.543
161	184	161_F	184_L	0.255	1.499	0.997
161	186	161_F	186_A	0.1113	0.654	0.529
161	170	161_F	170_D	0.1096	0.644	0.512
161	250	161_F	250_I	0.1083	0.637	0.5
162	165	162_H	165_G	0.2478	1.457	0.996
162	187	162_H	187_R	0.1297	0.762	0.702
162	210	162_H	210_Q	0.127	0.746	0.679
162	298	162_H	298_W	0.1185	0.696	0.6
162	212	162_H	212_H	0.1026	0.603	0.442
163	186	163_N	186_A	0.3773	2.218	1
164	173	164_Q	173_W	0.1798	1.057	0.947
164	170	164_Q	170_D	0.1228	0.722	0.642
166	169	166_N	169_F	0.1006	0.591	0.422
170	174	170_D	174_N	0.1872	1.1	0.96
171	175	171_Y	175_T	0.2376	1.397	0.995
174	178	174_N	178_R	0.1789	1.052	0.945
174	184	174_N	184_L	0.1034	0.608	0.45
178	184	178_R	184_L	0.1413	0.831	0.791
178	183	178_R	183_R	0.1286	0.756	0.694
183	202	183_R	202_Y	0.2113	1.242	0.985
183	193	183_R	193_P	0.1663	0.978	0.912
183	197	183_R	197_S	0.1414	0.831	0.791
185	197	185_H	197_S	0.1433	0.843	0.804
185	193	185_H	193_P	0.113	0.664	0.546
185	204	185_H	204_G	0.1121	0.659	0.538
187	300	187_R	300_L	0.1168	0.687	0.585
187	217	187_R	217_S	0.0994	0.584	0.41
190	195	190_G	195_I	0.1156	0.679	0.571
192	195	192_K	195_I	0.1974	1.16	0.973
192	235	192_K	235_R	0.1213	0.713	0.627
193	196	193_P	196_Q	0.1764	1.037	0.94
193	197	193_P	197_S	0.1177	0.692	0.593
194	204	194_F	204_G	0.2049	1.205	0.98
194	236	194_F	236_L	0.204	1.199	0.979
194	201	194_F	201_G	0.0984	0.579	0.402
195	199	195_I	199_R	0.1654	0.972	0.909
195	239	195_I	239_V	0.143	0.841	0.802
196	200	196_Q	200_Q	0.1504	0.884	0.845
196	239	196_Q	239_V	0.0953	0.56	0.371
197	202	197_S	202_Y	0.4265	2.507	1
197	204	197_S	204_G	0.1602	0.942	0.89
198	204	198_V	204_G	0.124	0.729	0.653
198	240	198_V	240_C	0.109	0.641	0.507
198	201	198_V	201_G	0.1019	0.599	0.435
204	285	204_G	285_V	0.1096	0.644	0.512
206	232	206_Y	232_A	0.1185	0.697	0.601
206	233	206_Y	233_I	0.0997	0.586	0.413
208	233	208_P	233_I	0.146	0.858	0.82
208	296	208_P	296_Y	0.0949	0.558	0.367
210	300	210_Q	300_L	0.2002	1.177	0.976
210	298	210_Q	298_W	0.1638	0.963	0.904
210	302	210_Q	302_L	0.1582	0.93	0.882
210	297	210_Q	297_T	0.1506	0.885	0.846
211	305	211_D	305_T	0.1757	1.033	0.938
211	219	211_D	219_F	0.136	0.799	0.752
211	228	211_D	228_A	0.1235	0.726	0.648
211	304	211_D	304_K	0.1045	0.614	0.46
212	230	212_H	230_L	0.1398	0.822	0.781
212	228	212_H	228_A	0.1262	0.742	0.673
217	228	217_S	228_A	0.1599	0.94	0.889
218	278	218_E	278_A	0.3034	1.783	1
218	275	218_E	275_H	0.1961	1.153	0.972
218	231	218_E	231_P	0.1354	0.796	0.749
218	279	218_E	279_R	0.1083	0.637	0.5
219	226	219_F	226_Y	0.2943	1.73	0.999
219	307	219_F	307_K	0.217	1.275	0.988
219	228	219_F	228_A	0.2149	1.263	0.987
219	305	219_F	305_T	0.1906	1.12	0.965
219	306	219_F	306_R	0.1218	0.716	0.632
220	279	220_V	279_R	0.3205	1.884	1
220	282	220_V	282_N	0.2768	1.627	0.999
220	278	220_V	278_A	0.1532	0.901	0.86
220	275	220_V	275_H	0.1277	0.751	0.686
220	229	220_V	229_T	0.105	0.617	0.466
221	279	221_D	279_R	0.4793	2.817	1
221	226	221_D	226_Y	0.4571	2.687	1
221	283	221_D	283_E	0.2544	1.496	0.997
221	224	221_D	224_A	0.1767	1.039	0.94
221	286	221_D	286_E	0.1052	0.619	0.469
221	229	221_D	229_T	0.104	0.611	0.455
222	289	222_F	289_V	0.1071	0.63	0.488
223	286	223_F	286_E	0.3552	2.088	1
223	290	223_F	290_G	0.2399	1.41	0.995
223	289	223_F	289_V	0.1101	0.647	0.517
225	306	225_T	306_R	0.1846	1.085	0.956
225	305	225_T	305_T	0.1174	0.69	0.59
226	307	226_Y	307_K	0.1703	1.001	0.924
227	302	227_K	302_L	0.1699	0.999	0.923
227	303	227_K	303_L	0.1694	0.996	0.922
227	232	227_K	232_A	0.1019	0.599	0.435
228	305	228_A	305_T	0.1524	0.896	0.855
229	282	229_T	282_N	0.3218	1.892	1
229	302	229_T	302_L	0.1331	0.782	0.73
231	235	231_P	235_R	0.1091	0.641	0.507
233	244	233_I	244_V	0.147	0.864	0.826
233	281	233_I	281_M	0.1418	0.834	0.795
233	284	233_I	284_E	0.0954	0.561	0.372
234	278	234_G	278_A	0.1897	1.115	0.964
234	238	234_G	238_K	0.1181	0.694	0.596
234	277	234_G	277_I	0.1138	0.669	0.555
234	269	234_G	269_L	0.1034	0.608	0.45
235	239	235_R	239_V	0.1345	0.79	0.741
236	240	236_L	240_C	0.1199	0.705	0.615
237	244	237_M	244_V	0.2105	1.238	0.984
238	277	238_K	277_I	0.1734	1.019	0.932
242	245	242_A	245_V	0.0954	0.561	0.372
243	265	243_R	265_P	0.1564	0.919	0.874
243	246	243_R	246_P	0.095	0.558	0.367
245	262	245_V	262_V	0.2313	1.36	0.993
246	263	246_P	263_R	0.338	1.987	1
246	265	246_P	265_P	0.2419	1.422	0.995
246	284	246_P	284_E	0.2222	1.306	0.99
246	266	246_P	266_M	0.1269	0.746	0.679
246	264	246_P	264_P	0.1192	0.701	0.608
247	262	247_L	262_V	0.1221	0.718	0.635
248	288	248_F	288_F	0.2026	1.191	0.978
248	263	248_F	263_R	0.1898	1.116	0.964
248	284	248_F	284_E	0.182	1.07	0.951
248	261	248_F	261_Q	0.1263	0.743	0.674
248	291	248_F	291_P	0.1237	0.727	0.65
250	292	250_I	292_R	0.3317	1.95	1
250	259	250_I	259_T	0.2945	1.731	0.999
250	261	250_I	261_Q	0.271	1.593	0.999
250	291	250_I	291_P	0.0983	0.578	0.4
251	295	251_Y	295_Q	0.1891	1.111	0.963
251	258	251_Y	258_L	0.1119	0.658	0.536
252	259	252_D	259_T	0.5023	2.953	1
252	257	252_D	257_R	0.17	0.999	0.923
252	291	252_D	291_P	0.1004	0.59	0.42
253	256	253_G	256_H	0.1623	0.954	0.898
253	257	253_G	257_R	0.1355	0.796	0.749
254	257	254_K	257_R	0.1699	0.999	0.923
261	291	261_Q	291_P	0.199	1.17	0.975
261	288	261_Q	288_F	0.0967	0.568	0.384
263	284	263_R	284_E	0.2529	1.487	0.997
263	287	263_R	287_I	0.198	1.164	0.974
263	291	263_R	291_P	0.1495	0.879	0.84
263	288	263_R	288_F	0.1267	0.745	0.677
264	267	264_P	267_D	0.1466	0.862	0.824
266	269	266_M	269_L	0.0952	0.56	0.371
268	271	268_D	271_E	0.1013	0.595	0.428
268	277	268_D	277_I	0.0982	0.577	0.398
269	277	269_L	277_I	0.127	0.747	0.68
271	277	271_E	277_I	0.1552	0.912	0.869
273	276	273_D	276_T	0.2273	1.336	0.992
274	278	274_D	278_A	0.1742	1.024	0.934
275	279	275_H	279_R	0.2804	1.648	0.999
276	280	276_T	280_R	0.1464	0.861	0.823
276	279	276_T	279_R	0.1315	0.773	0.718
277	280	277_I	280_R	0.1362	0.8	0.754
278	282	278_A	282_N	0.1015	0.597	0.432
279	283	279_R	283_E	0.6521	3.833	1
280	284	280_R	284_E	0.1858	1.092	0.958
280	283	280_R	283_E	0.1749	1.028	0.936
281	285	281_M	285_V	0.1025	0.603	0.442
283	286	283_E	286_E	0.4558	2.68	1
283	287	283_E	287_I	0.1832	1.077	0.954
284	287	284_E	287_I	0.2435	1.431	0.996
284	288	284_E	288_F	0.1892	1.112	0.963
285	289	285_V	289_V	0.1614	0.949	0.895
286	290	286_E	290_G	0.1829	1.075	0.953
287	290	287_I	290_G	0.1671	0.982	0.914
288	291	288_F	291_P	0.1678	0.986	0.917
292	295	292_R	295_Q	0.169	0.994	0.921
296	303	296_Y	303_L	0.143	0.841	0.802
297	300	297_T	300_L	0.0976	0.574	0.393
298	302	298_W	302_L	0.2022	1.189	0.978
298	304	298_W	304_K	0.1083	0.637	0.5
298	303	298_W	303_L	0.0981	0.576	0.397
300	304	300_L	304_K	0.1477	0.868	0.83
304	307	304_K	307_K	0.1019	0.599	0.435
306	310	306_R	310_E	0.1627	0.956	0.899
307	310	307_K	310_E	0.0957	0.562	0.374
310	313	310_E	313_P	0.1009	0.593	0.425
311	314	311_I	314_Y	0.1032	0.606	0.447

## Sheet: LpxP
i	j	i_id	j_id	r_sco	s_sco	prob
10	13	10_E	13_H	0.1724	0.991	0.919
11	16	11_F	16_Y	0.1662	0.955	0.899
11	14	11_F	14_P	0.1335	0.767	0.709
11	15	11_F	15_R	0.1272	0.731	0.656
11	304	11_F	304_L	0.1047	0.602	0.44
12	16	12_L	16_Y	0.1509	0.867	0.829
12	17	12_L	17_W	0.1071	0.615	0.462
13	16	13_H	16_Y	0.0988	0.568	0.384
14	17	14_P	17_W	0.218	1.253	0.986
14	20	14_P	20_W	0.1036	0.595	0.428
17	20	17_W	20_W	0.1737	0.999	0.923
18	158	18_L	158_N	0.1061	0.61	0.454
19	23	19_T	23_L	0.1188	0.683	0.578
19	164	19_T	164_V	0.1003	0.576	0.397
20	23	20_W	23_L	0.1134	0.651	0.524
20	24	20_W	24_G	0.1061	0.61	0.454
21	24	21_F	24_G	0.0977	0.561	0.372
22	26	22_G	26_L	0.0982	0.565	0.379
23	164	23_L	164_V	0.1999	1.149	0.971
23	27	23_L	27_W	0.1661	0.955	0.899
24	28	24_G	28_L	0.1051	0.604	0.443
24	27	24_G	27_W	0.1009	0.58	0.403
26	94	26_L	94_G	0.1645	0.945	0.892
27	31	27_W	31_Q	0.2615	1.503	0.997
27	30	27_W	30_V	0.1337	0.769	0.712
28	32	28_L	32_L	0.1129	0.649	0.52
29	91	29_W	91_V	0.1019	0.586	0.413
30	98	30_V	98_F	0.1148	0.66	0.539
30	33	30_V	33_P	0.1017	0.585	0.412
31	36	31_Q	36_V	0.15	0.862	0.824
32	40	32_L	40_L	0.1586	0.912	0.869
32	36	32_L	36_V	0.1311	0.754	0.691
32	35	32_L	35_P	0.1222	0.702	0.61
33	36	33_P	36_V	0.3682	2.116	1
34	38	34_Y	38_C	0.1629	0.936	0.886
35	39	35_P	39_F	0.2087	1.2	0.979
35	38	35_P	38_C	0.158	0.908	0.865
36	39	36_V	39_F	0.1561	0.897	0.856
37	91	37_L	91_V	0.2127	1.223	0.982
37	95	37_L	95_M	0.1508	0.867	0.829
38	88	38_C	88_M	0.1789	1.028	0.936
38	42	38_C	42_T	0.125	0.718	0.635
38	41	38_C	41_G	0.1082	0.622	0.474
39	43	39_F	43_R	0.2502	1.438	0.996
39	42	39_F	42_T	0.2268	1.303	0.99
40	43	40_L	43_R	0.1275	0.733	0.659
41	87	41_G	87_G	0.3799	2.184	1
41	45	41_G	45_G	0.1604	0.922	0.876
42	84	42_T	84_R	0.2764	1.589	0.999
42	88	42_T	88_M	0.2433	1.399	0.995
42	46	42_T	46_A	0.099	0.569	0.385
43	47	43_R	47_M	0.2061	1.185	0.977
43	46	43_R	46_A	0.1532	0.88	0.841
43	84	43_R	84_R	0.1111	0.639	0.503
44	87	44_I	87_G	0.1324	0.761	0.701
45	87	45_G	87_G	0.1286	0.739	0.668
45	49	45_G	49_R	0.1281	0.737	0.665
45	50	45_G	50_P	0.1135	0.652	0.526
45	84	45_G	84_R	0.1094	0.629	0.486
46	84	46_A	84_R	0.399	2.293	1
46	80	46_A	80_A	0.1798	1.034	0.939
46	49	46_A	49_R	0.1198	0.689	0.588
46	77	46_A	77_K	0.1005	0.578	0.4
46	50	46_A	50_P	0.098	0.563	0.375
47	51	47_M	51_F	0.1645	0.946	0.893
49	80	49_R	80_A	0.2346	1.348	0.992
49	56	49_R	56_E	0.2121	1.219	0.982
49	79	49_R	79_I	0.188	1.081	0.955
49	76	49_R	76_E	0.1414	0.812	0.769
49	60	49_R	60_R	0.1136	0.653	0.527
50	80	50_P	80_A	0.1611	0.926	0.879
50	76	50_P	76_E	0.1396	0.802	0.756
52	55	52_L	55_R	0.145	0.833	0.793
53	56	53_K	56_E	0.2261	1.3	0.99
53	57	53_K	57_S	0.1298	0.746	0.679
54	58	54_R	58_I	0.1176	0.676	0.566
55	291	55_R	291_H	0.1627	0.935	0.886
55	58	55_R	58_I	0.1053	0.605	0.445
55	83	55_R	83_F	0.1014	0.583	0.408
55	295	55_R	295_K	0.1005	0.578	0.4
56	60	56_E	60_R	0.1948	1.12	0.965
56	83	56_E	83_F	0.1477	0.849	0.811
57	61	57_S	61_K	0.1974	1.135	0.968
58	292	58_I	292_R	0.3452	1.984	1
58	62	58_I	62_N	0.1547	0.889	0.849
58	291	58_I	291_H	0.1311	0.753	0.689
58	61	58_I	61_K	0.1089	0.626	0.481
58	67	58_I	67_F	0.1073	0.617	0.466
59	79	59_A	79_I	0.3098	1.781	1
59	82	59_A	82_N	0.2311	1.328	0.991
59	290	59_A	290_I	0.1735	0.997	0.922
59	63	59_A	63_L	0.147	0.845	0.807
59	83	59_A	83_F	0.1201	0.691	0.592
60	79	60_R	79_I	0.523	3.006	1
60	76	60_R	76_E	0.4447	2.556	1
60	64	60_R	64_E	0.2472	1.421	0.995
60	75	60_R	75_R	0.2293	1.318	0.991
60	72	60_R	72_A	0.1063	0.611	0.455
61	64	61_K	64_E	0.2994	1.721	0.999
61	65	61_K	65_L	0.1659	0.953	0.897
61	216	61_K	216_V	0.1409	0.81	0.766
61	292	61_K	292_R	0.1155	0.664	0.546
61	295	61_K	295_K	0.1092	0.628	0.484
61	304	61_K	304_L	0.098	0.563	0.375
62	214	62_N	214_F	0.1689	0.971	0.908
62	280	62_N	280_I	0.1655	0.951	0.896
62	66	62_N	66_C	0.1063	0.611	0.455
63	75	63_L	75_R	0.4881	2.805	1
63	79	63_L	79_I	0.1652	0.949	0.895
63	70	63_L	70_H	0.1482	0.852	0.814
63	78	63_L	78_M	0.133	0.764	0.705
63	66	63_L	66_C	0.1	0.575	0.395
64	75	64_E	75_R	0.3515	2.02	1
64	72	64_E	72_A	0.334	1.92	1
65	216	65_L	216_V	0.3643	2.094	1
65	214	65_L	214_F	0.129	0.742	0.673
65	294	65_L	294_F	0.1048	0.602	0.44
66	294	66_C	294_F	0.2308	1.327	0.991
66	214	66_C	214_F	0.159	0.914	0.87
66	75	66_C	75_R	0.1122	0.645	0.514
67	70	67_F	70_H	0.3321	1.909	1
67	75	67_F	75_R	0.1761	1.012	0.929
68	75	68_P	75_R	0.0993	0.571	0.388
69	281	69_Q	281_M	0.4112	2.364	1
70	74	70_H	74_E	0.4264	2.451	1
70	78	70_H	78_M	0.3625	2.083	1
70	75	70_H	75_R	0.2376	1.366	0.993
71	74	71_S	74_E	0.4293	2.467	1
72	76	72_A	76_E	0.1101	0.633	0.493
74	78	74_E	78_M	0.238	1.368	0.993
74	77	74_E	77_K	0.2015	1.158	0.973
76	79	76_E	79_I	0.0982	0.564	0.377
77	81	77_K	81_E	0.2431	1.397	0.995
78	285	78_M	285_E	0.1859	1.069	0.951
78	82	78_M	82_N	0.1049	0.603	0.442
79	82	79_I	82_N	0.1253	0.72	0.639
80	84	80_A	84_R	0.128	0.736	0.664
81	285	81_E	285_E	0.5111	2.937	1
81	84	81_E	84_R	0.1167	0.671	0.558
82	290	82_N	290_I	0.1526	0.877	0.839
82	86	82_N	86_L	0.1234	0.709	0.621
82	288	82_N	288_L	0.1173	0.674	0.563
83	86	83_F	86_L	0.1224	0.704	0.613
85	88	85_S	88_M	0.1582	0.909	0.866
85	286	85_S	286_Q	0.138	0.793	0.745
85	285	85_S	285_E	0.1364	0.784	0.733
85	243	85_S	243_R	0.1239	0.712	0.626
85	135	85_S	135_S	0.1142	0.656	0.532
85	92	85_S	92_E	0.0986	0.567	0.382
86	290	86_L	290_I	0.1657	0.952	0.897
86	288	86_L	288_L	0.1073	0.617	0.466
86	89	86_L	89_A	0.0985	0.566	0.38
87	90	87_G	90_L	0.1683	0.967	0.906
87	91	87_G	91_V	0.1178	0.677	0.568
88	92	88_M	92_E	0.155	0.891	0.851
88	243	88_M	243_R	0.1188	0.683	0.578
88	246	88_M	246_D	0.0984	0.565	0.379
89	130	89_A	130_G	0.1054	0.606	0.447
92	243	92_E	243_R	0.3355	1.928	1
92	135	92_E	135_S	0.1284	0.738	0.667
93	185	93_T	185_I	0.1009	0.58	0.403
95	136	95_M	136_L	0.1009	0.58	0.403
96	196	96_A	196_W	0.115	0.661	0.541
99	103	99_W	103_R	0.1544	0.887	0.848
100	103	100_P	103_R	0.1058	0.608	0.45
101	105	101_D	105_R	0.1977	1.136	0.969
101	141	101_D	141_R	0.1118	0.643	0.51
103	107	103_R	107_W	0.1506	0.865	0.827
105	145	105_R	145_L	0.1397	0.803	0.758
108	142	108_F	142_V	0.1184	0.68	0.573
109	251	109_D	251_R	0.5887	3.383	1
109	249	109_D	249_G	0.2868	1.648	0.999
109	244	109_D	244_K	0.1655	0.951	0.896
110	142	110_V	142_V	0.1456	0.837	0.798
110	113	110_V	113_L	0.1263	0.726	0.648
110	116	110_V	116_L	0.1019	0.586	0.413
110	254	110_V	254_I	0.0974	0.56	0.371
111	251	111_E	251_R	0.6325	3.635	1
111	253	111_E	253_F	0.5366	3.084	1
112	115	112_G	115_N	0.3918	2.252	1
112	254	112_G	254_I	0.1513	0.87	0.832
112	256	112_G	256_P	0.136	0.782	0.73
112	119	112_G	119_A	0.1103	0.634	0.495
113	117	113_L	117_K	0.327	1.88	1
113	116	113_L	116_L	0.1206	0.693	0.595
114	118	114_D	118_R	0.3372	1.938	1
114	117	114_D	117_K	0.1135	0.652	0.526
115	256	115_N	256_P	0.4206	2.417	1
115	237	115_N	237_L	0.3027	1.74	0.999
115	118	115_N	118_R	0.2914	1.675	0.999
115	119	115_N	119_A	0.1697	0.976	0.911
115	257	115_N	257_E	0.1109	0.637	0.5
116	126	116_L	126_V	0.1363	0.783	0.731
116	128	116_L	128_V	0.112	0.644	0.512
117	121	117_K	121_M	0.3082	1.771	1
117	120	117_K	120_Q	0.1401	0.805	0.76
118	122	118_R	122_Q	0.262	1.506	0.997
118	121	118_R	121_M	0.1774	1.02	0.933
119	237	119_A	237_L	0.2121	1.219	0.982
119	126	119_A	126_V	0.1576	0.906	0.864
119	122	119_A	122_Q	0.1439	0.827	0.787
119	124	119_A	124_R	0.0985	0.566	0.38
120	192	120_Q	192_G	0.1142	0.657	0.534
122	235	122_Q	235_A	0.1787	1.027	0.936
123	192	123_N	192_G	0.1336	0.768	0.711
124	235	124_R	235_A	0.3123	1.795	1
124	233	124_R	233_G	0.1986	1.141	0.97
125	234	125_G	234_A	0.1697	0.975	0.911
125	193	125_G	193_E	0.1666	0.957	0.9
125	189	125_G	189_L	0.1406	0.808	0.764
125	235	125_G	235_A	0.1184	0.681	0.575
125	232	125_G	232_S	0.1073	0.617	0.466
125	192	125_G	192_G	0.1051	0.604	0.443
125	233	125_G	233_G	0.103	0.592	0.423
125	195	125_G	195_V	0.0993	0.57	0.387
126	235	126_V	235_A	0.2563	1.473	0.997
126	194	126_V	194_A	0.2331	1.34	0.992
126	237	126_V	237_L	0.1038	0.597	0.432
127	234	127_M	234_A	0.2085	1.198	0.979
127	228	127_M	228_L	0.135	0.776	0.722
127	195	127_M	195_V	0.1268	0.729	0.653
127	225	127_M	225_T	0.1003	0.577	0.398
128	239	128_V	239_V	0.197	1.133	0.968
128	194	128_V	194_A	0.1791	1.029	0.937
129	272	129_V	272_M	0.1759	1.011	0.929
129	199	129_V	199_P	0.1595	0.917	0.872
129	276	129_V	276_I	0.1041	0.598	0.433
130	196	130_G	196_W	0.132	0.759	0.698
130	241	130_G	241_M	0.1064	0.612	0.457
130	139	130_G	139_G	0.0977	0.561	0.372
131	276	131_V	276_I	0.2337	1.343	0.992
131	199	131_V	199_P	0.1321	0.759	0.698
131	198	131_V	198_A	0.1093	0.628	0.484
131	272	131_V	272_M	0.107	0.615	0.462
131	221	131_V	221_T	0.1009	0.58	0.403
133	286	133_F	286_Q	0.1732	0.996	0.922
133	283	133_F	283_A	0.1431	0.823	0.782
133	279	133_F	279_E	0.134	0.77	0.714
134	197	134_M	197_F	0.1119	0.643	0.51
134	198	134_M	198_A	0.1064	0.611	0.455
134	241	134_M	241_M	0.1022	0.587	0.415
135	201	135_S	201_Q	0.1205	0.693	0.595
135	287	135_S	287_Y	0.1191	0.685	0.582
136	198	136_L	198_A	0.1663	0.956	0.899
136	169	136_L	169_R	0.1123	0.645	0.514
136	196	136_L	196_W	0.1051	0.604	0.443
137	169	137_E	169_R	0.1573	0.904	0.862
137	196	137_E	196_W	0.1207	0.694	0.596
137	151	137_E	151_A	0.11	0.632	0.491
137	201	137_E	201_Q	0.1061	0.61	0.454
138	241	138_L	241_M	0.1038	0.597	0.432
139	198	139_G	198_A	0.1376	0.791	0.742
139	196	139_G	196_W	0.115	0.661	0.541
139	239	139_G	239_V	0.1072	0.616	0.464
140	151	140_G	151_A	0.1647	0.947	0.894
140	202	140_G	202_D	0.1346	0.774	0.719
140	169	140_G	169_R	0.123	0.707	0.618
140	196	140_G	196_W	0.0993	0.571	0.388
143	149	143_M	149_M	0.1212	0.697	0.601
146	192	146_C	192_G	0.1415	0.813	0.77
148	193	148_P	193_E	0.1266	0.728	0.651
148	175	148_P	175_A	0.1016	0.584	0.41
150	193	150_M	193_E	0.4091	2.351	1
150	177	150_M	177_I	0.2384	1.37	0.994
150	188	150_M	188_A	0.2318	1.332	0.992
150	175	150_M	175_A	0.1599	0.919	0.874
151	176	151_A	176_M	0.1421	0.817	0.775
151	174	151_A	174_K	0.1148	0.66	0.539
152	185	152_T	185_I	0.186	1.069	0.951
152	197	152_T	197_F	0.1163	0.669	0.555
153	176	153_Y	176_M	0.2579	1.482	0.997
153	178	153_Y	178_G	0.111	0.638	0.502
153	162	153_Y	162_E	0.1106	0.636	0.498
153	242	153_Y	242_V	0.1099	0.632	0.491
154	157	154_R	157_N	0.25	1.437	0.996
154	179	154_R	179_R	0.1356	0.779	0.726
154	201	154_R	201_Q	0.1275	0.733	0.659
154	289	154_R	289_W	0.1198	0.689	0.588
154	203	154_R	203_Y	0.1035	0.595	0.428
155	178	155_P	178_G	0.3868	2.223	1
156	165	156_H	165_Q	0.1853	1.065	0.95
156	162	156_H	162_E	0.129	0.741	0.671
157	177	157_N	177_I	0.0983	0.565	0.379
162	166	162_E	166_T	0.1993	1.145	0.97
163	167	163_W	167_R	0.2526	1.452	0.996
163	166	163_W	166_T	0.1021	0.587	0.415
166	170	166_T	170_M	0.1839	1.057	0.947
166	176	166_T	176_M	0.1086	0.624	0.478
170	176	170_M	176_M	0.1461	0.84	0.801
170	175	170_M	175_A	0.1339	0.77	0.714
175	193	175_A	193_E	0.2185	1.256	0.986
175	184	175_A	184_G	0.1719	0.988	0.918
175	188	175_A	188_A	0.1507	0.866	0.828
177	188	177_I	188_A	0.1306	0.751	0.686
177	184	177_I	184_G	0.1182	0.679	0.571
177	195	177_I	195_V	0.1164	0.669	0.555
179	291	179_R	291_H	0.1212	0.697	0.601
179	208	179_R	208_S	0.1026	0.59	0.42
179	183	179_R	183_R	0.0982	0.564	0.377
181	186	181_N	186_V	0.1298	0.746	0.679
183	186	183_R	186_V	0.2015	1.158	0.973
183	227	183_R	227_V	0.1237	0.711	0.624
184	187	184_G	187_G	0.1861	1.07	0.951
184	188	184_G	188_A	0.1262	0.726	0.648
185	195	185_I	195_V	0.2204	1.267	0.987
185	228	185_I	228_L	0.1991	1.144	0.97
185	192	185_I	192_G	0.1029	0.591	0.422
186	190	186_V	190_K	0.2201	1.265	0.987
186	231	186_V	231_L	0.1457	0.837	0.798
187	191	187_G	191_K	0.1747	1.004	0.926
188	193	188_A	193_E	0.4368	2.51	1
188	195	188_A	195_V	0.1567	0.901	0.86
189	195	189_L	195_V	0.1256	0.722	0.642
189	232	189_L	232_S	0.1193	0.686	0.583
189	192	189_L	192_G	0.1029	0.591	0.422
190	232	190_K	232_S	0.0979	0.563	0.375
190	234	190_K	234_A	0.0969	0.557	0.366
197	223	197_F	223_N	0.1254	0.721	0.64
199	225	199_P	225_T	0.1463	0.841	0.802
201	291	201_Q	291_H	0.2026	1.164	0.974
201	289	201_Q	289_W	0.1717	0.987	0.917
201	293	201_Q	293_R	0.1635	0.94	0.889
201	288	201_Q	288_L	0.1484	0.853	0.815
202	296	202_D	296_T	0.1815	1.043	0.942
202	210	202_D	210_F	0.149	0.856	0.818
202	219	202_D	219_V	0.1295	0.744	0.676
202	295	202_D	295_K	0.1076	0.619	0.469
203	221	203_Y	221_T	0.1404	0.807	0.763
203	219	203_Y	219_V	0.1239	0.712	0.626
208	219	208_S	219_V	0.1567	0.901	0.86
209	269	209_S	269_A	0.309	1.776	1
209	266	209_S	266_N	0.2004	1.152	0.972
209	222	209_S	222_T	0.1319	0.758	0.696
209	270	209_S	270_A	0.1022	0.587	0.415
210	217	210_F	217_E	0.2934	1.686	0.999
210	219	210_F	219_V	0.2317	1.332	0.992
210	298	210_F	298_P	0.2281	1.311	0.99
210	296	210_F	296_T	0.1943	1.117	0.964
210	297	210_F	297_R	0.1283	0.738	0.667
211	270	211_A	270_A	0.3335	1.917	1
211	273	211_A	273_N	0.27	1.552	0.998
211	269	211_A	269_A	0.1602	0.921	0.875
211	266	211_A	266_N	0.1267	0.728	0.651
211	220	211_A	220_A	0.1171	0.673	0.561
212	270	212_P	270_A	0.4785	2.75	1
212	217	212_P	217_E	0.4646	2.671	1
212	274	212_P	274_K	0.247	1.419	0.995
212	215	212_P	215_A	0.1751	1.006	0.926
212	277	212_P	277_E	0.1099	0.632	0.491
212	220	212_P	220_A	0.1047	0.602	0.44
213	280	213_F	280_I	0.106	0.609	0.452
214	277	214_F	277_E	0.3742	2.151	1
214	281	214_F	281_M	0.2377	1.366	0.993
214	280	214_F	280_I	0.1181	0.679	0.571
216	297	216_V	297_R	0.1854	1.066	0.95
216	296	216_V	296_T	0.1167	0.671	0.558
217	298	217_E	298_P	0.174	1	0.924
218	293	218_N	293_R	0.1813	1.042	0.942
218	294	218_N	294_F	0.1681	0.966	0.905
218	223	218_N	223_N	0.1026	0.59	0.42
219	296	219_V	296_T	0.1583	0.91	0.867
219	298	219_V	298_P	0.0999	0.574	0.393
220	273	220_A	273_N	0.3289	1.89	1
220	293	220_A	293_R	0.129	0.741	0.671
222	227	222_T	227_V	0.1004	0.577	0.398
225	236	225_T	236_M	0.15	0.862	0.824
225	272	225_T	272_M	0.1258	0.723	0.643
226	269	226_Y	269_A	0.1972	1.133	0.968
226	230	226_Y	230_R	0.1141	0.656	0.532
226	268	226_Y	268_A	0.1056	0.607	0.449
227	231	227_V	231_L	0.133	0.764	0.705
228	232	228_L	232_S	0.1198	0.689	0.588
229	236	229_S	236_M	0.2088	1.2	0.979
230	268	230_R	268_A	0.2046	1.176	0.976
233	263	233_G	263_T	0.1358	0.781	0.729
234	237	234_A	237_L	0.0973	0.559	0.369
235	257	235_A	257_E	0.162	0.931	0.883
237	254	237_L	254_I	0.2354	1.353	0.993
238	255	238_T	255_T	0.3519	2.022	1
238	257	238_T	257_E	0.2497	1.435	0.996
238	275	238_T	275_I	0.2368	1.361	0.993
238	258	238_T	258_M	0.1375	0.79	0.741
238	256	238_T	256_P	0.1074	0.617	0.466
239	254	239_V	254_I	0.1295	0.744	0.676
240	279	240_T	279_E	0.2001	1.15	0.971
240	275	240_T	275_I	0.1963	1.128	0.967
240	255	240_T	255_T	0.1851	1.064	0.949
240	253	240_T	253_F	0.1267	0.728	0.651
240	282	240_T	282_R	0.1212	0.697	0.601
242	283	242_V	283_A	0.3359	1.93	1
242	251	242_V	251_R	0.3002	1.726	0.999
242	253	242_V	253_F	0.276	1.587	0.999
242	282	242_V	282_R	0.1039	0.597	0.432
243	286	243_R	286_Q	0.1981	1.139	0.969
243	250	243_R	250_Y	0.1155	0.664	0.546
244	251	244_K	251_R	0.5128	2.947	1
244	249	244_K	249_G	0.1794	1.031	0.937
244	282	244_K	282_R	0.1026	0.59	0.42
245	249	245_A	249_G	0.1771	1.018	0.932
245	248	245_A	248_S	0.1548	0.89	0.85
246	249	246_D	249_G	0.1491	0.857	0.819
253	282	253_F	282_R	0.208	1.195	0.979
253	279	253_F	279_E	0.1013	0.582	0.407
255	275	255_T	275_I	0.3093	1.778	1
255	278	255_T	278_K	0.2147	1.234	0.984
255	282	255_T	282_R	0.1361	0.783	0.731
255	279	255_T	279_E	0.1268	0.729	0.653
256	259	256_P	259_E	0.1372	0.788	0.738
258	271	258_M	271_Y	0.1087	0.625	0.479
260	268	260_G	268_A	0.1115	0.641	0.507
260	263	260_G	263_T	0.1092	0.627	0.483
261	268	261_Y	268_A	0.1109	0.637	0.5
262	268	262_P	268_A	0.1354	0.778	0.725
263	268	263_T	268_A	0.1785	1.026	0.935
264	267	264_D	267_Q	0.2772	1.593	0.999
265	269	265_E	269_A	0.1646	0.946	0.893
266	270	266_N	270_A	0.2718	1.562	0.998
267	271	267_Q	271_Y	0.1529	0.879	0.84
267	270	267_Q	270_A	0.1438	0.826	0.785
268	271	268_A	271_Y	0.1045	0.601	0.438
269	273	269_A	273_N	0.1071	0.616	0.464
270	274	270_A	274_K	0.6772	3.892	1
271	274	271_Y	274_K	0.2008	1.154	0.972
271	275	271_Y	275_I	0.1801	1.035	0.939
272	276	272_M	276_I	0.1199	0.689	0.588
274	277	274_K	277_E	0.4264	2.451	1
274	278	274_K	278_K	0.1607	0.924	0.878
275	278	275_I	278_K	0.2485	1.428	0.996
275	279	275_I	279_E	0.1899	1.092	0.958
276	280	276_I	280_I	0.1789	1.028	0.936
277	281	277_E	281_M	0.1827	1.05	0.945
278	281	278_K	281_M	0.1659	0.953	0.897
279	282	279_E	282_R	0.1649	0.948	0.894
283	286	283_A	286_Q	0.1696	0.975	0.911
287	294	287_Y	294_F	0.1379	0.793	0.745
288	291	288_L	291_H	0.104	0.598	0.433
289	293	289_W	293_R	0.2085	1.198	0.979
289	295	289_W	295_K	0.1193	0.686	0.583
291	295	291_H	295_K	0.1556	0.894	0.854
295	298	295_K	298_P	0.1006	0.578	0.4
297	301	297_R	301_E	0.1057	0.607	0.449
301	304	301_E	304_L	0.149	0.856	0.818
302	305	302_S	305_Y	0.1185	0.681	0.575

## Sheet: YihG
i	j	i_id	j_id	r_sco	s_sco	prob
12	15	12_R	15_A	0.0597	0.9	0.609
12	16	12_R	16_A	0.0525	0.791	0.465
13	16	13_I	16_A	0.0735	1.109	0.827
13	188	13_I	188_F	0.049	0.738	0.396
13	51	13_I	51_V	0.0478	0.72	0.373
14	21	14_L	21_L	0.0693	1.045	0.772
14	18	14_L	18_T	0.0691	1.042	0.769
14	80	14_L	80_H	0.0541	0.816	0.498
15	137	15_A	137_L	0.0587	0.884	0.589
15	20	15_A	20_L	0.052	0.785	0.457
16	185	16_A	185_I	0.0589	0.888	0.594
16	155	16_A	155_A	0.0486	0.733	0.389
17	42	17_I	42_I	0.0817	1.232	0.902
17	20	17_I	20_L	0.0662	0.999	0.726
17	21	17_I	21_L	0.0583	0.878	0.581
17	55	17_I	55_K	0.055	0.829	0.516
17	27	17_I	27_I	0.0527	0.794	0.469
17	28	17_I	28_L	0.0524	0.789	0.462
17	59	17_I	59_F	0.0523	0.788	0.461
17	197	17_I	197_E	0.048	0.724	0.378
18	228	18_T	228_F	0.0608	0.917	0.631
19	247	19_L	247_F	0.126	1.9	0.997
19	251	19_L	251_S	0.0734	1.106	0.824
19	41	19_L	41_G	0.0549	0.827	0.513
19	22	19_L	22_S	0.0529	0.798	0.474
20	23	20_L	23_I	0.0974	1.469	0.97
20	286	20_L	286_Q	0.0498	0.751	0.412
20	38	20_L	38_I	0.0484	0.73	0.385
20	45	20_L	45_L	0.0479	0.722	0.375
21	46	21_L	46_L	0.0515	0.777	0.446
21	229	21_L	229_D	0.0484	0.73	0.385
22	27	22_S	27_I	0.0743	1.12	0.835
22	74	22_S	74_L	0.0569	0.857	0.553
22	25	22_S	25_L	0.0555	0.837	0.527
22	117	22_S	117_R	0.052	0.785	0.457
23	159	23_I	159_R	0.0529	0.798	0.474
23	38	23_I	38_I	0.0478	0.72	0.373
24	31	24_V	31_I	0.0573	0.864	0.562
24	291	24_V	291_L	0.0489	0.737	0.394
25	140	25_L	140_A	0.0714	1.076	0.8
26	74	26_T	74_L	0.0791	1.193	0.882
26	30	26_T	30_T	0.0693	1.044	0.771
27	260	27_I	260_H	0.0511	0.77	0.437
29	71	29_V	71_L	0.0581	0.876	0.578
31	35	31_I	35_V	0.105	1.583	0.984
31	46	31_I	46_L	0.05	0.754	0.416
33	66	33_C	66_C	0.0854	1.288	0.926
33	63	33_C	63_M	0.0619	0.933	0.65
33	40	33_C	40_A	0.057	0.86	0.557
33	70	33_C	70_G	0.051	0.77	0.437
33	43	33_C	43_V	0.0495	0.747	0.407
34	38	34_S	38_I	0.0786	1.185	0.878
34	37	34_S	37_I	0.0478	0.72	0.373
35	38	35_V	38_I	0.0526	0.793	0.468
35	154	35_V	154_R	0.0516	0.778	0.448
37	41	37_I	41_G	0.0585	0.883	0.587
37	63	37_I	63_M	0.0498	0.751	0.412
39	51	39_I	51_V	0.052	0.784	0.456
40	59	40_A	59_F	0.069	1.04	0.767
40	162	40_A	162_E	0.0568	0.857	0.553
40	233	40_A	233_N	0.0561	0.845	0.537
40	56	40_A	56_V	0.0485	0.732	0.388
42	47	42_I	47_L	0.0498	0.751	0.412
43	52	43_V	52_I	0.0626	0.944	0.664
44	48	44_K	48_P	0.0486	0.733	0.389
44	57	44_K	57_S	0.0479	0.722	0.375
44	252	44_K	252_G	0.0478	0.721	0.374
46	301	46_L	301_S	0.0495	0.747	0.407
47	261	47_L	261_V	0.0596	0.899	0.608
47	52	47_L	52_I	0.049	0.739	0.397
49	52	49_V	52_I	0.0967	1.459	0.969
50	54	50_P	54_R	0.0884	1.333	0.941
50	180	50_P	180_L	0.0619	0.933	0.65
51	54	51_V	54_R	0.0533	0.804	0.482
53	232	53_W	232_L	0.0582	0.878	0.581
55	58	55_K	58_R	0.0593	0.894	0.601
57	61	57_S	61_D	0.0571	0.86	0.557
57	259	57_S	259_V	0.0512	0.772	0.44
58	181	58_R	181_H	0.0608	0.917	0.631
59	63	59_F	63_M	0.0508	0.766	0.432
59	304	59_F	304_S	0.0504	0.76	0.424
60	68	60_C	68_C	0.0924	1.392	0.956
60	146	60_C	146_M	0.0646	0.974	0.698
60	140	60_C	140_A	0.0631	0.951	0.672
61	234	61_D	234_V	0.063	0.949	0.669
61	65	61_D	65_Y	0.0573	0.864	0.562
63	297	63_M	297_R	0.0478	0.72	0.373
64	144	64_M	144_L	0.0638	0.962	0.685
64	141	64_M	141_C	0.0525	0.792	0.466
65	118	65_Y	118_K	0.0595	0.897	0.605
66	185	66_C	185_I	0.0496	0.747	0.407
67	71	67_W	71_L	0.0689	1.039	0.766
67	106	67_W	106_W	0.0661	0.997	0.724
67	246	67_W	246_F	0.0534	0.806	0.485
68	113	68_C	113_C	0.052	0.785	0.457
68	120	68_C	120_I	0.0504	0.759	0.423
68	215	68_C	215_A	0.0477	0.719	0.372
69	117	69_E	117_R	0.0729	1.1	0.82
69	72	69_E	72_A	0.0581	0.876	0.578
71	113	71_L	113_C	0.0616	0.929	0.645
72	114	72_A	114_V	0.0752	1.134	0.845
72	75	72_A	75_L	0.0675	1.018	0.746
72	257	72_A	257_I	0.0511	0.771	0.439
73	77	73_V	77_L	0.0559	0.843	0.535
73	87	73_V	87_G	0.0551	0.831	0.518
73	136	73_V	136_F	0.0537	0.809	0.489
75	249	75_L	249_M	0.0676	1.019	0.747
75	107	75_L	107_A	0.057	0.86	0.557
75	159	75_L	159_R	0.0546	0.822	0.506
75	114	75_L	114_V	0.0494	0.745	0.405
76	118	76_H	118_K	0.0838	1.264	0.916
77	83	77_L	83_W	0.0525	0.792	0.466
79	91	79_P	91_L	0.0571	0.861	0.558
79	246	79_P	246_F	0.0562	0.847	0.54
82	256	82_Q	256_R	0.1524	2.297	1
82	88	82_Q	88_L	0.051	0.769	0.436
82	297	82_Q	297_R	0.0478	0.721	0.374
83	250	83_W	250_L	0.0479	0.722	0.375
84	258	84_E	258_V	0.1007	1.518	0.977
84	260	84_E	260_H	0.0993	1.498	0.975
84	302	84_E	302_L	0.0823	1.24	0.906
84	256	84_E	256_R	0.0695	1.047	0.774
84	262	84_E	262_D	0.053	0.799	0.476
85	297	85_V	297_R	0.0792	1.194	0.883
85	307	85_V	307_R	0.0716	1.079	0.802
85	196	85_V	196_Q	0.0517	0.779	0.449
86	260	86_H	260_H	0.1453	2.191	0.999
86	258	86_H	258_V	0.0532	0.801	0.478
87	277	87_G	277_D	0.0521	0.786	0.458
88	261	88_L	261_V	0.0661	0.997	0.724
90	301	90_G	301_S	0.0573	0.864	0.562
92	95	92_S	95_N	0.0515	0.777	0.446
95	263	95_N	263_L	0.0566	0.854	0.549
96	183	96_W	183_T	0.0653	0.984	0.71
96	124	96_W	124_K	0.0567	0.855	0.55
96	175	96_W	175_C	0.0528	0.795	0.47
97	184	97_Y	184_T	0.0954	1.439	0.965
97	232	97_Y	232_L	0.0648	0.977	0.702
97	292	97_Y	292_W	0.0632	0.953	0.674
97	149	97_Y	149_M	0.0507	0.764	0.429
98	217	98_L	217_I	0.1066	1.608	0.986
98	168	98_L	168_V	0.0608	0.917	0.631
98	172	98_L	172_R	0.0581	0.877	0.579
98	179	98_L	179_R	0.0503	0.759	0.423
98	225	98_L	225_G	0.0493	0.743	0.402
100	233	100_I	233_N	0.0772	1.164	0.865
100	217	100_I	217_I	0.076	1.146	0.853
100	288	100_I	288_L	0.0606	0.914	0.627
100	189	100_I	189_V	0.0536	0.808	0.488
100	187	100_I	187_N	0.0496	0.747	0.407
101	306	101_C	306_Q	0.0507	0.764	0.429
102	108	102_N	108_D	0.0644	0.97	0.694
102	212	102_N	212_P	0.051	0.769	0.436
102	238	102_N	238_Y	0.0487	0.734	0.39
103	108	103_H	108_D	0.0615	0.927	0.643
104	188	104_R	188_F	0.0607	0.915	0.628
104	146	104_R	146_M	0.0502	0.756	0.419
104	107	104_R	107_A	0.0477	0.719	0.372
105	193	105_S	193_R	0.0757	1.142	0.851
105	198	105_S	198_K	0.0684	1.031	0.759
105	188	105_S	188_F	0.061	0.919	0.633
106	246	106_W	246_F	0.0899	1.355	0.947
106	193	106_W	193_R	0.0841	1.268	0.918
106	109	106_W	109_I	0.0536	0.809	0.489
106	198	106_W	198_K	0.0525	0.792	0.466
106	113	106_W	113_C	0.0478	0.721	0.374
107	244	107_A	244_Q	0.1164	1.755	0.993
107	146	107_A	146_M	0.0484	0.729	0.384
109	127	109_I	127_L	0.0769	1.159	0.862
109	125	109_I	125_Y	0.0625	0.942	0.661
109	148	109_I	148_F	0.0584	0.881	0.585
109	113	109_I	113_C	0.052	0.784	0.456
109	192	109_I	192_S	0.0511	0.77	0.437
109	126	109_I	126_F	0.0494	0.745	0.405
110	245	110_V	245_P	0.0592	0.893	0.6
111	259	111_V	259_V	0.0863	1.301	0.93
111	257	111_V	257_I	0.0526	0.793	0.468
112	188	112_L	188_F	0.0635	0.957	0.679
113	146	113_C	146_M	0.0888	1.339	0.942
113	141	113_C	141_C	0.0796	1.201	0.886
113	125	113_C	125_Y	0.0671	1.011	0.738
113	186	113_C	186_V	0.0542	0.818	0.501
113	134	113_C	134_V	0.0493	0.744	0.403
113	127	113_C	127_L	0.0485	0.732	0.388
114	193	114_V	193_R	0.0508	0.765	0.431
116	184	116_F	184_T	0.0888	1.338	0.942
116	234	116_F	234_V	0.0684	1.031	0.759
116	121	116_F	121_P	0.0633	0.955	0.677
116	219	116_F	219_M	0.0566	0.853	0.548
116	220	116_F	220_A	0.0519	0.782	0.453
119	173	119_H	173_R	0.0587	0.886	0.591
119	140	119_H	140_A	0.0549	0.828	0.514
119	126	119_H	126_F	0.0534	0.806	0.485
120	185	120_I	185_I	0.0489	0.737	0.394
121	174	121_P	174_S	0.066	0.995	0.722
121	182	121_P	182_P	0.0638	0.962	0.685
121	126	121_P	126_F	0.0493	0.743	0.402
123	186	123_N	186_V	0.086	1.296	0.928
123	146	123_N	146_M	0.0773	1.166	0.866
123	184	123_N	184_T	0.0685	1.033	0.761
123	211	123_N	211_P	0.0652	0.983	0.708
124	252	124_K	252_G	0.0528	0.795	0.47
125	186	125_Y	186_V	0.0581	0.876	0.578
125	292	125_Y	292_W	0.0503	0.758	0.421
126	171	126_F	171_T	0.0728	1.097	0.817
126	175	126_F	175_C	0.056	0.844	0.536
126	198	126_F	198_K	0.0549	0.828	0.514
126	147	126_F	147_P	0.0541	0.815	0.497
126	220	126_F	220_A	0.052	0.783	0.454
127	131	127_L	131_L	0.0891	1.344	0.944
127	148	127_L	148_F	0.0855	1.289	0.926
127	134	127_L	134_V	0.0776	1.169	0.868
127	219	127_L	219_M	0.0538	0.812	0.493
127	215	127_L	215_A	0.0529	0.797	0.473
128	131	128_K	131_L	0.1015	1.531	0.979
128	151	128_K	151_R	0.0974	1.468	0.97
128	135	128_K	135_P	0.0922	1.39	0.956
128	191	128_K	191_G	0.0783	1.18	0.875
128	216	128_K	216_G	0.0722	1.088	0.81
128	192	128_K	192_S	0.0701	1.057	0.783
128	138	128_K	138_G	0.0506	0.763	0.428
129	150	129_Q	150_K	0.1429	2.155	0.999
129	132	129_Q	132_A	0.1013	1.527	0.978
129	208	129_Q	208_N	0.0555	0.836	0.525
129	170	129_Q	170_T	0.0523	0.789	0.462
130	173	130_Q	173_R	0.0652	0.983	0.708
131	148	131_L	148_F	0.0834	1.258	0.914
131	192	131_L	192_S	0.0557	0.84	0.531
131	135	131_L	135_P	0.0556	0.838	0.528
131	140	131_L	140_A	0.0526	0.793	0.468
132	148	132_A	148_F	0.054	0.814	0.496
133	251	133_W	251_S	0.0675	1.017	0.745
133	193	133_W	193_R	0.0611	0.921	0.636
133	201	133_W	201_Q	0.048	0.723	0.377
134	142	134_V	142_W	0.0587	0.884	0.589
135	216	135_P	216_G	0.0651	0.982	0.707
135	151	135_P	151_R	0.0638	0.961	0.684
135	191	135_P	191_G	0.0597	0.901	0.61
135	193	135_P	193_R	0.051	0.769	0.436
135	192	135_P	192_S	0.0486	0.733	0.389
136	143	136_F	143_S	0.0628	0.947	0.667
136	145	136_F	145_D	0.0503	0.759	0.423
137	292	137_L	292_W	0.0615	0.928	0.644
138	148	138_G	148_F	0.0677	1.02	0.748
138	216	138_G	216_G	0.0626	0.944	0.664
138	191	138_G	191_G	0.0537	0.809	0.489
140	167	140_A	167_D	0.0491	0.74	0.398
141	148	141_C	148_F	0.1023	1.543	0.98
142	193	142_W	193_R	0.0505	0.762	0.427
144	193	144_L	193_R	0.0507	0.764	0.429
145	177	145_D	177_K	0.0558	0.842	0.533
146	167	146_M	167_D	0.0592	0.893	0.6
146	245	146_M	245_P	0.0531	0.801	0.478
147	174	147_P	174_S	0.0503	0.758	0.421
147	175	147_P	175_C	0.0496	0.748	0.408
148	191	148_F	191_G	0.063	0.95	0.671
149	219	149_M	219_M	0.096	1.448	0.967
149	167	149_M	167_D	0.0508	0.765	0.431
150	296	150_K	296_D	0.0553	0.833	0.521
151	167	151_R	167_D	0.1126	1.697	0.991
151	192	151_R	192_S	0.0768	1.158	0.861
151	216	151_R	216_G	0.0707	1.066	0.791
151	191	151_R	191_G	0.0545	0.821	0.505
151	182	151_R	182_P	0.0531	0.8	0.477
152	165	152_Y	165_G	0.0714	1.076	0.8
152	157	152_Y	157_L	0.0546	0.822	0.506
152	162	152_Y	162_E	0.0483	0.728	0.383
153	156	153_S	156_Y	0.1072	1.616	0.986
153	162	153_S	162_E	0.0498	0.751	0.412
154	158	154_R	158_L	0.1048	1.58	0.983
154	159	154_R	159_R	0.0571	0.861	0.558
155	159	155_A	159_R	0.0617	0.93	0.647
155	278	155_A	278_K	0.0506	0.762	0.427
156	163	156_Y	163_R	0.2317	3.494	1
156	160	156_Y	160_H	0.1928	2.906	1
156	162	156_Y	162_E	0.1821	2.745	1
156	278	156_Y	278_K	0.0527	0.795	0.47
157	160	157_L	160_H	0.1396	2.105	0.999
157	162	157_L	162_E	0.0915	1.379	0.953
157	163	157_L	163_R	0.0746	1.124	0.838
157	217	157_L	217_I	0.0549	0.828	0.514
157	164	157_L	164_R	0.0543	0.819	0.502
158	278	158_L	278_K	0.0795	1.198	0.885
158	162	158_L	162_E	0.0709	1.069	0.794
158	164	158_L	164_R	0.0565	0.852	0.546
158	279	158_L	279_S	0.0534	0.805	0.484
158	282	158_L	282_R	0.0508	0.765	0.431
158	275	158_L	275_I	0.0501	0.755	0.418
160	163	160_H	163_R	0.1375	2.073	0.999
160	276	160_H	276_N	0.0512	0.772	0.44
162	287	162_E	287_W	0.062	0.934	0.651
162	275	162_E	275_I	0.0553	0.834	0.523
163	166	163_R	166_K	0.0755	1.139	0.849
163	168	163_R	168_V	0.0511	0.77	0.437
164	175	164_R	175_C	0.0543	0.819	0.502
164	171	164_R	171_T	0.0486	0.732	0.388
165	169	165_G	169_E	0.0543	0.819	0.502
166	169	166_K	169_E	0.0694	1.047	0.774
166	170	166_K	170_T	0.0513	0.773	0.441
167	216	167_D	216_G	0.0615	0.928	0.644
167	210	167_D	210_L	0.0591	0.891	0.598
168	215	168_V	215_A	0.0539	0.813	0.494
168	276	168_V	276_N	0.0523	0.789	0.462
168	172	168_V	172_R	0.0514	0.775	0.444
169	172	169_E	172_R	0.0615	0.927	0.643
169	234	169_E	234_V	0.0477	0.719	0.372
170	178	170_T	178_F	0.0519	0.783	0.454
172	223	172_R	223_V	0.0636	0.96	0.682
172	176	172_R	176_E	0.0498	0.75	0.411
173	249	173_R	249_M	0.0507	0.765	0.431
174	209	174_S	209_L	0.0546	0.823	0.508
174	220	174_S	220_A	0.0478	0.721	0.374
175	224	175_C	224_L	0.0629	0.948	0.668
175	218	175_C	218_A	0.0549	0.827	0.513
176	220	176_E	220_A	0.0497	0.75	0.411
178	224	178_F	224_L	0.0578	0.871	0.572
178	223	178_F	223_V	0.0525	0.792	0.466
179	257	179_R	257_I	0.0639	0.963	0.686
182	193	182_P	193_R	0.0479	0.722	0.375
183	228	183_T	228_F	0.0584	0.88	0.583
183	220	183_T	220_A	0.0503	0.759	0.423
185	220	185_I	220_A	0.0716	1.079	0.802
188	236	188_F	236_L	0.0717	1.081	0.804
188	251	188_F	251_S	0.0632	0.953	0.674
188	192	188_F	192_S	0.0546	0.822	0.506
188	194	188_F	194_F	0.0486	0.733	0.389
189	288	189_V	288_L	0.1568	2.364	1
189	217	189_V	217_I	0.0524	0.79	0.464
191	216	191_G	216_G	0.0546	0.823	0.508
192	216	192_S	216_G	0.0547	0.825	0.51
193	198	193_R	198_K	0.0846	1.275	0.921
194	199	194_F	199_H	0.092	1.387	0.955
194	207	194_F	207_Q	0.0477	0.719	0.372
195	198	195_T	198_K	0.0678	1.022	0.75
195	199	195_T	199_H	0.0479	0.722	0.375
196	200	196_Q	200_Q	0.0737	1.111	0.828
196	260	196_Q	260_H	0.0596	0.898	0.607
196	290	196_Q	290_S	0.0488	0.735	0.392
197	201	197_E	201_Q	0.0654	0.986	0.712
197	200	197_E	200_Q	0.0646	0.975	0.7
197	207	197_E	207_Q	0.0522	0.787	0.46
197	282	197_E	282_R	0.0482	0.726	0.38
198	214	198_K	214_A	0.049	0.739	0.397
199	202	199_H	202_T	0.0574	0.865	0.564
200	290	200_Q	290_S	0.0506	0.763	0.428
201	237	201_Q	237_C	0.0522	0.787	0.46
201	302	201_Q	302_L	0.0506	0.762	0.427
202	211	202_T	211_P	0.079	1.192	0.882
203	206	203_H	206_F	0.0634	0.955	0.677
203	282	203_H	282_R	0.0478	0.72	0.373
206	211	206_F	211_P	0.0707	1.065	0.79
206	289	206_F	289_N	0.0657	0.991	0.717
206	244	206_F	244_Q	0.0514	0.775	0.444
206	292	206_F	292_W	0.0491	0.741	0.399
207	300	207_Q	300_T	0.1398	2.107	0.999
207	296	207_Q	296_D	0.0684	1.031	0.759
208	300	208_N	300_T	0.1471	2.218	0.999
208	303	208_N	303_M	0.0811	1.222	0.897
208	296	208_N	296_D	0.0733	1.105	0.824
209	292	209_L	292_W	0.0633	0.955	0.677
209	299	209_L	299_L	0.0568	0.856	0.552
210	216	210_L	216_G	0.0542	0.817	0.5
210	238	210_L	238_Y	0.0488	0.736	0.393
212	233	212_P	233_N	0.0499	0.752	0.414
213	218	213_K	218_A	0.054	0.814	0.496
214	285	214_A	285_Q	0.0481	0.725	0.379
215	244	215_A	244_Q	0.0503	0.759	0.423
215	219	215_A	219_M	0.0486	0.732	0.388
217	269	217_I	269_E	0.0565	0.852	0.546
218	274	218_A	274_Y	0.0781	1.178	0.873
218	284	218_A	284_F	0.0659	0.993	0.719
220	275	220_A	275_I	0.0533	0.803	0.481
220	223	220_A	223_V	0.0488	0.736	0.393
220	257	220_A	257_I	0.0482	0.726	0.38
221	266	221_L	266_I	0.0716	1.079	0.802
222	273	222_N	273_D	0.0618	0.931	0.648
224	229	224_L	229_D	0.0558	0.842	0.533
224	289	224_L	289_N	0.0527	0.795	0.47
224	236	224_L	236_L	0.0501	0.755	0.418
225	228	225_G	228_F	0.0562	0.847	0.54
225	231	225_G	231_L	0.0504	0.76	0.424
225	283	225_G	283_H	0.0486	0.733	0.389
230	263	230_K	263_L	0.1424	2.146	0.999
231	266	231_L	266_I	0.0578	0.871	0.572
231	247	231_L	247_F	0.0499	0.752	0.414
231	235	231_L	235_T	0.0496	0.748	0.408
232	263	232_L	263_L	0.0924	1.393	0.956
233	262	233_N	262_D	0.2373	3.577	1
233	264	233_N	264_Q	0.0674	1.016	0.744
233	298	233_N	298_L	0.0638	0.962	0.685
233	295	233_N	295_K	0.0586	0.883	0.587
234	259	234_V	259_V	0.0488	0.735	0.392
236	257	236_L	257_I	0.0532	0.802	0.48
237	299	237_C	299_L	0.3119	4.703	1
237	303	237_C	303_M	0.0811	1.223	0.898
237	275	237_C	275_I	0.0624	0.941	0.66
237	258	237_C	258_V	0.0504	0.76	0.424
240	256	240_D	256_R	0.0914	1.378	0.953
240	255	240_D	255_T	0.0657	0.99	0.716
246	250	246_F	250_L	0.0612	0.923	0.638
247	251	247_F	251_S	0.0925	1.394	0.956
247	257	247_F	257_I	0.0591	0.89	0.596
248	253	248_D	253_K	0.1309	1.973	0.998
248	288	248_D	288_L	0.0553	0.834	0.523
256	279	256_R	279_S	0.0539	0.813	0.494
258	302	258_V	302_L	0.0989	1.491	0.974
258	299	258_V	299_L	0.0549	0.827	0.513
260	298	260_H	298_L	0.1268	1.911	0.997
262	294	262_D	294_E	0.1717	2.589	1
262	301	262_D	301_S	0.0776	1.17	0.869
262	291	262_D	291_L	0.0639	0.964	0.687
262	298	262_D	298_L	0.0578	0.871	0.572
264	294	264_Q	294_E	0.0947	1.427	0.963
265	268	265_P	268_D	0.0903	1.362	0.949
267	270	267_A	270_L	0.0487	0.734	0.39
269	288	269_E	288_L	0.063	0.951	0.672
269	280	269_E	280_F	0.0515	0.777	0.446
272	283	272_G	283_H	0.062	0.935	0.653
272	277	272_G	277_D	0.0493	0.743	0.402
273	276	273_D	276_N	0.1566	2.36	1
274	277	274_Y	277_D	0.0529	0.798	0.474
275	279	275_I	279_S	0.0695	1.048	0.775
275	278	275_I	278_K	0.0584	0.88	0.583
276	282	276_N	282_R	0.0549	0.828	0.514
276	308	276_N	308_Q	0.0534	0.806	0.485
276	279	276_N	279_S	0.0515	0.777	0.446
276	280	276_N	280_F	0.0507	0.764	0.429
277	280	277_D	280_F	0.0988	1.49	0.973
278	282	278_K	282_R	0.0747	1.126	0.839
279	300	279_S	300_T	0.0616	0.929	0.645
281	285	281_K	285_Q	0.0481	0.725	0.379
282	286	282_R	286_Q	0.0605	0.912	0.624
286	290	286_Q	290_S	0.0813	1.225	0.899
287	296	287_W	296_D	0.082	1.237	0.904
290	294	290_S	294_E	0.0794	1.196	0.884
290	293	290_S	293_Q	0.0554	0.835	0.524
291	294	291_L	294_E	0.0676	1.019	0.747
292	295	292_W	295_K	0.064	0.964	0.687
293	297	293_Q	297_R	0.0502	0.756	0.419
297	301	297_R	301_S	0.0797	1.201	0.886
298	306	298_L	306_Q	0.0682	1.029	0.757
298	302	298_L	302_L	0.0551	0.831	0.518
299	303	299_L	303_M	0.1536	2.316	1
300	304	300_T	304_S	0.1088	1.64	0.988
301	305	301_S	305_S	0.0959	1.447	0.967
301	304	301_S	304_S	0.0754	1.137	0.847
